# Supplementary material for: Development of a generic sample preparation method using dispersive liquid–liquid microextraction for the monitoring of leachable compounds in hospital pharmacy-prepared prefilled drug products
Source: Royal Society of Chemistry journal article supplement (doi:10.1039/d3ay02234j), 2024-01-01
Supplement: d3ay02234j1.pdf [file d3ay02234j1.pdf]

**ELECTRONIC SUPPLEMENTARY INFORMATION**

**Development of a generic sample preparation by dispersive liquid-liquid micro-extractions for the monitoring of leachable compounds in hospital pharmacy-prepared prefilled drug products**

AUTHORS: William Bello<sup>1,2,3,4</sup>, Julian Pezzatti<sup>1</sup>, Serge Rudaz<sup>3,4,5</sup> and Farshid Sadeghipour<sup>1,2,3,4\*</sup>

(1) Service of Pharmacy, Lausanne University Hospital

(2) Center for Research and Innovation in Clinical Pharmaceutical Sciences, Lausanne University Hospital and University of Lausanne

(3) School of Pharmaceutical Sciences, University of Geneva, CMU-Rue Michel Servet 1, 1211, Geneva 4, Switzerland

(4) Institute of Pharmaceutical Sciences of Western Switzerland, University of Geneva, University of Lausanne

(5) Swiss Center of Applied Human Toxicology (SCATH), Basel, Switzerland

\*corresponding author

**CORRESPONDENCE:**

Prof. F. Sadeghipour, Service of Pharmacy, Lausanne University Hospital, Switzerland ; Centre for Research and Innovation in Clinical Pharmaceutical Sciences, Lausanne University Hospital and University of Lausanne, Switzerland ; School of Pharmaceutical Sciences, University of Geneva, CMU-Rue Michel Servet 1, 1211, Geneva 4, Switzerland ; Institute of Pharmaceutical Sciences of Western Switzerland, University of Geneva, CMU-Rue Michel Servet 1, 1211, Geneva 4, Switzerland

E-mail: farshid.sadeghipour@unige.ch; farshid.sadeghipour@chuv.ch

**Table S1.** Physical-chemical properties and mass parameters of all standards used in the development of DLLME

| N° | Name of Compound                                                                        | CAS                | Log P | pKa         | Retention time (minutes) | Polarity | Monoisotopic mass (Da) | m/z        | Adduct | Category                                      | Functional group |
|----|-----------------------------------------------------------------------------------------|--------------------|-------|-------------|--------------------------|----------|------------------------|------------|--------|-----------------------------------------------|------------------|
| 1  | Diphenyl hydrogen phosphate                                                             | 838-85-7           | 1.34  | 0.87        | 0.43                     | Negative | 250.03949              | 249.03222  | -H     | Degradant of plasticizer and flame retardants | phosphate        |
| 2  | 4,4'-Sulfonyldiphenol                                                                   | 80-09-1            | 1.83  | 7.42        | 0.77                     | Negative | 250.029984             | 249.0227   | -H     | Monomer and epoxy degradant                   | Phenol           |
| 3  | 4,4'-Methylenediphenol                                                                  | 620-92-8           | 2.73  | 9.84        | 1.27                     | Negative | 200.083725             | 199.07645  | -H     | Monomer and epoxy degradant                   | Phenol           |
| 4  | 4-Methoxy-2-(2-methyl-2-propanyl)phenol - 4-methoxy-3-(2-methyl-2-propanyl)phenol (1:1) | 121-00-6 / 88-32-4 | 3     | 10.57/10.01 | 2.24                     | Negative | 180.115036             | 179.10775  | -H     | Antioxidant                                   | Phenol           |
| 5  | 4,4'-(1,1-Ethanediy)ldiphenol                                                           | 05.08.2081         | 3.08  | 9.81        | 1.63                     | Negative | 214.09938              | 213.0921   | -H     | Monomer and epoxy degradant                   | Phenol           |
| 6  | 4,4'-(2,2-Propanediy)ldiphenol                                                          | 80-05-7            | 3.43  | 9.78        | 1.85                     | Negative | 228.115036             | 227.10775  | -H     | Monomer and epoxy degradant                   | Phenol           |
| 7  | 4,4'-(2,2-Butanediy)ldiphenol                                                           | 77-40-7            | 3.96  | 9.77        | 2.46                     | Negative | 241.1234               | 242.130676 | -H     | Monomer and epoxy degradant                   | Phenol           |
| 8  | Phenyl phosphate                                                                        | 115-86-6           | 4.1   | -           | 4                        | Positive | 326.070801             | 327.07807  | +H     | Flame retardant / plasticizer                 | Phosphate        |
| 9  | 4-(2-Phenyl-2-propanyl)phenol                                                           | 599-64-4           | 4.17  | 10.08       | 3.16                     | Negative | 212.120117             | 211.11284  | -H     | Degradant of Bisphenol A                      | Phenol           |

|    |                                                                          |            |      |       |      |          |            |           |    |                                 |                 |
|----|--------------------------------------------------------------------------|------------|------|-------|------|----------|------------|-----------|----|---------------------------------|-----------------|
| 10 | 3-[4-Hydroxy-3,5-bis(2-methyl-2-propanyl)phenyl]propanoic acid           | 20170-32-5 | 4.48 | 4.79  | 3.34 | Negative | 278.188202 | 277.18092 | -H | Monomer of complex antioxidants | Carboxylic acid |
| 11 | 4-Methoxy-2,6-bis(2-methyl-2-propanyl)phenol                             | 489-01-0   | 4.69 | 11.21 | 4.04 | Negative | 236.177628 | 235.17035 | -H | Antioxidant                     | Phenol          |
| 12 | B4-Hydroxy-3,5-bis(2-methyl-2-propanyl)benzoic acid                      | 1421-49-4  | 4.8  | 4.36  | 2.9  | Negative | 250.156891 | 249.14962 | -H | Oxidation of Bisphenol A        | Carboxylic acid |
| 13 | 4-Methyl-2,6-bis(2-methyl-2-propanyl)phenol                              | 128-37-0   | 5.32 | 11.6  | 4.72 | Negative | 220.182709 | 219.17544 | -H | Antioxidant                     | Phenol          |
| 14 | 4,4'-(1,3-Phenylenedi-2,2-propanediyl)diphenol                           | 13595-25-0 | 6.12 | 9.78  | 4.37 | Negative | 346.193268 | 345.186   | -H | Monomer and epoxy degradant     | Phenol          |
| 15 | 2,4,6-Tris(2-methyl-2-propanyl)phenol                                    | 732-26-3   | 6.55 | 11.49 | 5.4  | Negative | 262.229675 | 261.22239 | -H | Antioxidant                     | Phenol          |
| 16 | 2-(5-Chloro-2H-benzotriazol-2-yl)-4-methyl-6-(2-methyl-2-propanyl)phenol | 05.11.3896 | 6.58 | 10.08 | 6.3  | Negative | 315.113831 | 314.10656 | -H | UV absorber                     | Phenol          |
| 17 | 2,2'-Methylenebis[4-methyl-6-(2-methyl-2-propanyl)phenol]                | 119-47-1   | 7.03 | 8.92  | 5.8  | Negative | 340.240234 | 339.23295 | -H | Antioxidant                     | Phenol          |
| 18 | (9Z)-9-Octadecenamide                                                    | 301-02-0   | 7.07 | -     | 6.47 | Positive | 281.271851 | 282.27914 | +H | Lubricant                       | Amide           |

|    |                                                                                                                                 |             |       |       |      |          |            |           |      |             |        |
|----|---------------------------------------------------------------------------------------------------------------------------------|-------------|-------|-------|------|----------|------------|-----------|------|-------------|--------|
| 19 | [2-Hydroxy-4-(octyloxy)phenyl]phenylmethanone                                                                                   | 1843-05-6   | 7.36  | 7.07  | 6.14 | Negative | 326.188202 | 325.18092 | -H   | UV absorber | Phenol |
| 20 | 4,4'-Sulfanediylbis[5-methyl-2-(2-methyl-2-propanyl)phenol]                                                                     | 96-69-5     | 7.63  | 9.69  | 5.04 | Negative | 358.196655 | 357.18937 | -H   | Antioxidant | Phenol |
| 21 | 2,2'-Methylenebis[4-ethyl-6-(2-methyl-2-propanyl)phenol]                                                                        | 88-24-4     | 8.09  | 8.88  | 6.16 | Negative | 368.271515 | 367.26425 | -H   | Antioxidant | Phenol |
| 22 | 2-(2H-Benzotriazol-2-yl)-4,6-bis(2-methyl-2-butanyl)phenol                                                                      | 25973-55-1  | 8.28  | 9.94  | 6.69 | Negative | 351.231049 | 350.22379 | -H   | UV absorber | Phenol |
| 23 | 3-[4-Hydroxy-3,5-bis(2-methyl-2-propanyl)phenyl]-N'-(3-[4-hydroxy-3,5-bis(2-methyl-2-propanyl)phenyl]propanoyl)propanehydrazide | 32687-78-8  | 8.37  | 10.37 | 6.5  | Negative | 552.3927   | 551.38543 | -H   | Antioxidant | Amide  |
| 24 | Octyl 3-[4-hydroxy-3,5-bis(2-methyl-2-propanyl)phenyl]propanoate                                                                | 125643-61-0 | 8.62  | 10.75 | 6.38 | Negative | 390.313385 | 389.30612 | -H   | Antioxidant | Ester  |
| 25 | 1,3,5-Tris[4-hydroxy-3,5-bis(2-methyl-2-propanyl)benzyl]-1,3,5-triazinane-2,4,6-trione                                          | 27676-62-6  | 10.34 | -     | 12   | Positive | 783.518616 | 801.55246 | +NH4 | Antioxidant | Phenol |

|    |                                                                                                         |            |       |      |      |          |            |           |      |             |        |
|----|---------------------------------------------------------------------------------------------------------|------------|-------|------|------|----------|------------|-----------|------|-------------|--------|
| 26 | 1,2-EthanediyI bis(3,3-bis[4-hydroxy-3-(2-methyl-2-propanyl)phenyl]butanoate)                           | 32509-66-3 | 11.62 | 9.52 | 6.07 | Negative | 794.475769 | 793.46849 | -H   | Antioxidant | Ester  |
| 27 | (2R)-2,5,7,8-Tetramethyl-2-[[[4R,8R]-4,8,12-trimethyltridecyl]-6-chromanol                              | 59-02-9    | 11.9  | 10.8 | 7.31 | Negative | 430.381073 | 429.3738  | -H   | Antioxidant | Phenol |
| 28 | Didodecyl 3,3'-sulfanediylidipropanoate                                                                 | 123-28-4   | 12.88 | -    | 12   | Positive | 514.405579 | 515.41286 | +H   | Antioxidant | Thiol  |
| 29 | 4,4',4''-[[[2,4,6-Trimethylbenzene-1,3,5-triyl]tris(methylene)]tris[2,6-bis(2-methyl-2-propanyl)phenol] | 1709-70-2  | 17.49 | -    | 13   | Positive | 774.595093 | 792.62892 | +NH4 | Antioxidant | Phenol |

|    |                                                                                                                                                                                                                      |            |       |       |      |          |             |           |      |                             |               |
|----|----------------------------------------------------------------------------------------------------------------------------------------------------------------------------------------------------------------------|------------|-------|-------|------|----------|-------------|-----------|------|-----------------------------|---------------|
| 30 | 3-({3-[4-Hydroxy-3,5-bis(2-methyl-2-propanyl)phenyl]propanoyl}oxy)-2,2-bis[({3-[4-hydroxy-3,5-bis(2-methyl-2-propanyl)phenyl]propanoyl}oxy)methyl]propyl 3-[4-hydroxy-3,5-bis(2-methyl-2-propanyl)phenyl ]propanoate | 6683-19-8  | 18.89 | -     | 13   | Positive | 1176.784058 | 1194.8179 | +NH4 | Antioxidant                 | Ester         |
| 31 | Bis(2-ethylhexyl)phthalate-3,4,5,6-d4                                                                                                                                                                                | 93951-87-2 | 8.71  | -     | 8.68 | Positive | 394.3021167 | 395.30939 | +H   | Plasticizer                 | Ester         |
| 32 | Tinuvin® 327                                                                                                                                                                                                         | 3864-99-1  | 6.49  | 10.07 | 9.69 | Negative | 357.1607901 | 356.15351 | -H   | UV Stabilizer               | Benzotriazole |
| 33 | Bisphenol A-d16                                                                                                                                                                                                      | 96210-87-6 | 4.04  | 9.78  | 2.39 | Negative | 244.2154577 | 241.19563 | -H   | Monomer and epoxy degradant | Phenol        |

**Table S2.** Compilation of all information obtained after DLLME application on all products in the in-house database (DELTA). Information include some physical chemical properties, mass spectral information and DLLME recovery and relative standard deviation (RSD).

| N° | Name of Compounds                      | CAS        | Product Code | Retention time (mins) | Log P  | Polarity | M/Z       | DLLME Recovery (%) | RSD   |
|----|----------------------------------------|------------|--------------|-----------------------|--------|----------|-----------|--------------------|-------|
| 1  | N-methylformamide                      | 123-39-7   | RA7          | 2                     | -0.855 | positive | 60.04439  | 0.00               | 2.62% |
| 2  | N,N-Dimethylformamide                  | 68-12-2    | RA5          | 1.99                  | -0.632 | positive | 74.06004  | 0.00               | 7.02% |
| 3  | Caprolactam                            | 105-60-2   | O1           | 2.2                   | 0.31   | positive | 114.09134 | 63.10              | 3.45% |
| 4  | Methylbutanedioic acid, dimethyl ester | 1604-11-1  | PZ108        | 2.21                  | 0.436  | positive | 161.08084 | 60.70              | 6.02% |
| 5  | Diethyl hydrogen phosphate             | 598-02-7   | PZ45         | 1.22                  | 0.449  | positive | 155.04677 | 63.70              | 6.87% |
| 6  | Hydroxyphenylacetamide                 | 17194-82-0 | RA2          | 1.98                  | 0.5    | positive | 152.0706  | 69.10              | 6.87% |
| 7  | N-butylacetamide                       | 1119-49-9  | RA3          | 2.02                  | 0.517  | positive | 116.10699 | 67.20              | 5.74% |
| 8  | Dimethyl adipate                       | 627-93-0   | PZ8          | 2.2                   | 0.782  | positive | 175.09648 | 73.80              | 2.30% |
| 9  | methacrylic acid                       | 79-41-4    | AD10         | 2.09                  | 0.928  | negative | 85.0295   | 76.10              | 2.31% |
| 10 | 2-Hydroxyethyl terephthalate           | 1137-99-1  | PZ117        | 1.66                  | 0.944  | negative | 209.04555 | 75.20              | 5.87% |
| 11 | N-cyclohexylformamide                  | 766-93-8   | RA8          | 2.24                  | 0.944  | positive | 128.10699 | 76.80              | 4.60% |
| 12 | 2-hydroxypropyl methacrylate           | 27813-02-1 | AD11         | 2.24                  | 1.034  | positive | 145.08592 | 76.20              | 6.92% |

|    |                                            |            |      |       |       |          |           |       |       |
|----|--------------------------------------------|------------|------|-------|-------|----------|-----------|-------|-------|
| 13 | Vinyl caprolacam                           | 2235-00-9  | O4   | 2.45  | 1.038 | positive | 140.10699 | 84.90 | 5.89% |
| 14 | Caprolactone                               | 502-44-3   | O3   | 2.21  | 1.039 | positive | 115.07536 | 86.49 | 4.62% |
| 15 | 3-ethyl-3-methylpentanedioic acid          | 5345-01-7  | PZ25 | 2.234 | 1.078 | positive | 175.0965  | 96.10 | 3.93% |
| 16 | Bisphenol F Bis(2,3-dihydroxypropyl) Ether | 72406-26-9 | BP28 | 2.08  | 1.109 | positive | 366.19111 | 92.10 | 7.26% |
| 17 | N-butylformamide                           | 111-36-4   | RA9  | 2.018 | 1.281 | positive | 102.09134 | 81.00 | 3.70% |
| 18 | Benzotriazole                              | 95-14-7    | UV25 | 2.08  | 1.301 | positive | 120.05562 | 89.00 | 2.57% |
| 19 | Dimethyl-1,4-cyclohexanedicarboxylate      | 94-60-0    | PZ19 | 2.478 | 1.405 | positive | 201.11214 | 86.23 | 6.96% |
| 20 | Phthalic anhydride                         | 85-44-9    | PZ90 | 2.94  | 1.423 | positive | 149.02332 | 79.56 | 2.51% |
| 21 | Diethyl adipate                            | 141-28-6   | PZ3  | 2.581 | 1.496 | positive | 203.12779 | 85.78 | 5.83% |
| 22 | Phthalide                                  | 87-41-2    | PZ92 | 2.11  | 1.528 | positive | 135.04406 | 86.65 | 4.62% |
| 23 | pentaerythritol triacrylate                | 3524-68-3  | AD4  | 2.21  | 1.554 | positive | 299.11253 | 84.57 | 7.09% |
| 24 | 4 , 4'-diaminobenzophenone                 | 611-98-3   | UV16 | 1.97  | 1.66  | positive | 213.10224 | 86.61 | 6.93% |
| 25 | Methylparaben                              | 99-76-3    | AM1  | 2.29  | 1.673 | negative | 151.04007 | 87.12 | 3.44% |
| 26 | Bisphenol A bis(2,3-dihydroxypropyl) ether | 5581-32-8  | BP17 | 2.92  | 1.696 | positive | 394.22241 | 82.42 | 3.64% |
| 27 | tetrahydrofurfuryl methacrylate            | 2455-24-5  | AD9  | 2.52  | 1.726 | positive | 171.10157 | 87.40 | 4.58% |



|    |                                                   |            |       |       |       |          |           |       |       |
|----|---------------------------------------------------|------------|-------|-------|-------|----------|-----------|-------|-------|
| 28 | Bis(4-hydroxybutyl) terephthalate                 | 23358-95-4 | PZ113 | 2.23  | 1.755 | positive | 311.14891 | 82.05 | 4.88% |
| 29 | 4,4'-bis(Diethylamino)benzophenone                | 90-93-7    | UV39  | 5.92  | 1.775 | positive | 325.22744 | 87.32 | 5.73% |
| 30 | Azelaic acid                                      | 123-99-9   | PZ13  | 2.59  | 1.824 | positive | 189.11214 | 87.39 | 4.58% |
| 31 | Bis(2-methoxyethyl) phthalate                     | 117-82-8   | PZ68  | 2.35  | 1.886 | positive | 283.11761 | 85.66 | 3.50% |
| 32 | Dimethyl isophthalate                             | 1459-93-4  | PZ97  | 2.5   | 1.98  | positive | 195.06519 | 87.40 | 6.87% |
| 33 | Dimethyl phthalate                                | 131-11-3   | PZ69  | 2.29  | 1.98  | positive | 195.06519 | 81.38 | 7.37% |
| 34 | Monoethyl terephthalate                           | 713-57-5   | PZ112 | 2.54  | 1.991 | positive | 195.06519 | 66.50 | 9.02% |
| 35 | 2-Methyl-5-methylenehexanoic acid, dimethyl ester | 4513-62-6  | PZ9   | 2.53  | 2.01  | positive | 201.11214 | 77.59 | 2.58% |
| 36 | N,N-Dibutylformamide                              | 761-65-9   | RA6   | 2.85  | 2.016 | positive | 158.15394 | 85.75 | 7.00% |
| 37 | Ethylparaben                                      | 120-47-8   | AM2   | 2.41  | 2.03  | negative | 165.05572 | 78.89 | 5.07% |
| 38 | Tris ( 2-chloroethyl ) phosphate                  | 115-96-8   | PZ40  | 2.467 | 2.107 | positive | 284.96116 | 75.12 | 5.32% |
| 39 | Nonanedioic acid, dimethyl ester                  | 1732-10-1  | PZ31  | 2.859 | 2.116 | positive | 217.14344 | 82.68 | 7.26% |
| 40 | tetraethyleneglycol dimethacrylate                | 109-17-1   | AD17  | 2.91  | 2.303 | positive | 348.20168 | 82.76 | 7.25% |
| 41 | bisphenol S                                       | 80-09-1    | BP36  | 1.974 | 2.32  | negative | 249.0227  | 81.28 | 3.69% |
| 42 | triethyleneglycol dimethacrylate                  | 109-16-0   | AD16  | 2.91  | 2.35  | positive | 304.17546 | 83.04 | 3.61% |

|    |                                                  |            |      |      |       |          |           |       |       |
|----|--------------------------------------------------|------------|------|------|-------|----------|-----------|-------|-------|
| 43 | ethyleneglycol dimethacrylate                    | 97-90-5    | AD15 | 2.78 | 2.444 | positive | 216.12303 | 84.41 | 2.37% |
| 44 | 2-hydroxybenzophenone                            | 117-99-7   | UV15 | 3.24 | 2.486 | negative | 197.0608  | 84.69 | 7.08% |
| 45 | Propylparaben                                    | 94-13-3    | AM3  | 2.6  | 2.552 | negative | 179.07137 | 85.80 | 5.83% |
| 46 | 4-aminobenzophenone                              | 1137-41-3  | UV19 | 2.31 | 2.604 | positive | 198.09134 | 78.51 | 2.55% |
| 47 | Neopentyl glycol diacrylate                      | 2223-82-7  | AD21 | 2.8  | 2.684 | positive | 213.11214 | 80.18 | 2.49% |
| 48 | Diethyl phthalate                                | 84-66-2    | PZ55 | 2.61 | 2.694 | positive | 223.09649 | 83.43 | 4.79% |
| 49 | Tripropylene glycol diacrylate                   | 42978-66-5 | AD2  | 2.98 | 2.809 | positive | 318.19111 | 87.07 | 4.59% |
| 50 | 4-hydroxy-2', 4'-dimethoxybenzophenone           | 41351-30-8 | UV17 | 2.35 | 2.814 | negative | 257.08193 | 84.58 | 4.73% |
| 51 | 4,4'-Dihydroxy-benzophenone                      | 611-99-4   | UV8  | 2    | 2.825 | negative | 213.05572 | 85.93 | 3.49% |
| 52 | Nonanedioic acid, diethyl ester                  | 624-17-9   | PZ33 | 3.55 | 2.83  | positive | 245.17474 | 83.25 | 3.60% |
| 53 | Bisphenol A (2,3-dihydroxypropyl) glycidyl ether | 76002-91-0 | BP15 | 2.98 | 2.858 | positive | 376.21185 | 84.58 | 4.73% |
| 54 | 2, 3, 4, 4'-tetrahydroxybenzophenone             | 31127-54-5 | UV13 | 2.93 | 2.868 | negative | 245.04555 | 86.85 | 3.45% |
| 55 | Monoisobutyl phthalate                           | 30833-53-5 | PZ96 | 1.99 | 2.879 | positive | 223.09649 | 82.11 | 4.87% |
| 56 | 1,3-butanediol dimethacrylate                    | 1189-08-8  | AD18 | 3.16 | 2.92  | positive | 227.12779 | 83.63 | 2.39% |
| 57 | Diphenyl sulfone                                 | 127-63-9   | BP51 | 2.44 | 2.928 | positive | 219.04743 | 80.70 | 7.44% |

|    |                                                                                   |             |       |       |       |          |           |       |       |
|----|-----------------------------------------------------------------------------------|-------------|-------|-------|-------|----------|-----------|-------|-------|
| 58 | 2,4'-Dihydroxydiphenyl sulfone                                                    | 5397-34-2   | BP4   | 2.12  | 2.971 | negative | 249.0227  | 76.26 | 3.93% |
| 59 | Lauro lactam                                                                      | 947-04-6    | O2    | 2.93  | 2.977 | positive | 198.18524 | 86.07 | 2.32% |
| 60 | 3-(4-{2-[4-(3-chloro-2-hydroxypropoxy)phenyl]propan-2-yl}phenoxy)propane-1,2-diol | 227947-06-0 | BP20  | 3.047 | 3.05  | positive | 412.18853 | 67.67 | 2.96% |
| 61 | Phosphoric acid, diphenyl ester                                                   | 838-85-7    | PZ42  | 1.22  | 3.052 | negative | 249.03222 | 75.42 | 2.65% |
| 62 | 3-tert-butyl-4-methoxyphenol                                                      | 88-32-4     | AO118 | 2.7   | 3.057 | negative | 179.10775 | 71.52 | 2.80% |
| 63 | 2-tert-butyl-4-methoxyphenol                                                      | 121-00-6    | AO117 | 2.7   | 3.057 | negative | 179.10775 | 81.05 | 3.70% |
| 64 | Tributyl citrate                                                                  | 77-94-1     | PZ16  | 4.609 | 3.087 | positive | 361.22208 | 84.90 | 4.71% |
| 65 | 1,6 hexanediol diacrylate                                                         | 13048-33-4  | AD20  | 3.16  | 3.119 | positive | 227.12779 | 85.81 | 5.83% |
| 66 | 4-Hydroxybenzophenone                                                             | 1137-42-4   | UV6   | 2.45  | 3.129 | negative | 197.0608  | 83.53 | 3.59% |
| 67 | 3-hydroxybenzophenone                                                             | 13020-57-0  | UV18  | 2.45  | 3.129 | negative | 197.0608  | 87.37 | 6.87% |
| 68 | Drometrizole                                                                      | 2440-22-4   | UV31  | 4.28  | 3.186 | negative | 224.08294 | 85.45 | 3.51% |
| 69 | 3-(3-5-di-tert-butyl-1-hydroxy-4-oxo-2,5-cyclohexadiene-1-yl)propanoic acid       | 83237-15-4  | AO45  | 2.636 | 3.191 | negative | 293.17583 | 87.18 | 4.59% |
| 70 | 4-tert-butylphenyl glycidyl ether                                                 | 3101-60-8   | O9    | 3.67  | 3.202 | positive | 224.16451 | 87.37 | 6.87% |
| 71 | Bisphenol S-monoisopropyl ether                                                   | 95235-30-6  | BP37  | 2.57  | 3.24  | negative | 291.06965 | 86.98 | 4.60% |

|    |                                           |            |      |       |       |          |           |       |       |
|----|-------------------------------------------|------------|------|-------|-------|----------|-----------|-------|-------|
| 72 | Diisobutyl adipate                        | 141-04-8   | PZ5  | 4.125 | 3.271 | positive | 259.19039 | 85.78 | 2.33% |
| 73 | 4-Fluoro-4'-hydroxybenzophenone           | 25913-05-7 | UV5  | 2.52  | 3.272 | negative | 215.05138 | 87.21 | 5.73% |
| 74 | trimethylol propane triacrylate           | 15625-89-5 | AD3  | 2.99  | 3.279 | positive | 314.15981 | 86.50 | 4.62% |
| 75 | Tris ( 2-chloro-1-methylethyl ) phosphate | 13674-84-5 | PZ39 | 3.16  | 3.357 | positive | 327.00811 | 87.14 | 4.59% |
| 76 | Monobenzyl phthalate                      | 2528-16-7  | PZ80 | 2.03  | 3.359 | positive | 257.08084 | 86.58 | 3.47% |
| 77 | Diphenylamine                             | 122-39-4   | PZ12 | 3.184 | 3.413 | positive | 170.09643 | 86.26 | 4.64% |
| 78 | Dibutyl adipate                           | 105-99-7   | PZ4  | 4.27  | 3.43  | positive | 259.19039 | 86.60 | 3.46% |
| 79 | Bisphenol F Diglycidyl ether              | 2095-03-6  | BP30 | 3.54  | 3.43  | positive | 330.16998 | 85.83 | 3.50% |
| 80 | Benzophenone                              | 119-61-9   | UV7  | 3.03  | 3.433 | positive | 183.08044 | 86.90 | 6.90% |
| 81 | Diallyl phthalate                         | 131-17-9   | PZ74 | 2.98  | 3.443 | positive | 247.09649 | 86.25 | 4.64% |
| 82 | 2,2'-bisphenol F                          | 2467-02-9  | BP57 | 2.5   | 3.458 | negative | 199.07645 | 85.97 | 3.49% |
| 83 | bisphenol F                               | 620-92-8   | BP27 | 2.2   | 3.458 | negative | 199.07645 | 84.89 | 3.53% |
| 84 | 2,4'-dihydroxydiphenylmethane             | 2467-03-0  | BP58 | 2.26  | 3.458 | negative | 199.07645 | 86.60 | 3.46% |
| 85 | Benzoresorcinol                           | 131-56-6   | UV1  | 2.6   | 3.475 | negative | 213.05572 | 87.02 | 3.45% |
| 86 | 2,2',4,4'-Tetrahydroxybenzophenone        | 131-55-5   | UV2  | 2.1   | 3.518 | negative | 245.04555 | 84.97 | 4.71% |

|     |                                                              |             |       |       |       |          |           |       |       |
|-----|--------------------------------------------------------------|-------------|-------|-------|-------|----------|-----------|-------|-------|
| 87  | Acetyl tributyl citrate                                      | 77-90-7     | PZ17  | 5.384 | 3.528 | positive | 403.23264 | 87.28 | 5.73% |
| 88  | 2,6-di-tert-butyl-4-hydroxy-4-methylcyclohexa-2,5-dien-1-one | 10396-80-2  | AO120 | 3.508 | 3.544 | negative | 235.17035 | 87.38 | 6.87% |
| 89  | 4 , 4'-thiobisphenol                                         | 2664-63-3   | BP9   | 2.27  | 3.55  | negative | 217.03287 | 87.25 | 5.73% |
| 90  | Oxybenzone                                                   | 131-57-7    | UV4   | 3.53  | 3.621 | positive | 229.08592 | 81.88 | 7.33% |
| 91  | 2-tert-butyl-5-methylphenol                                  | 88-60-8     | AO30  | 3.22  | 3.728 | negative | 163.11284 | 85.83 | 2.33% |
| 92  | 2-tert-Butyl-4-methylphenol                                  | 2409-55-4   | AO29  | 3.22  | 3.728 | negative | 163.11284 | 86.80 | 5.76% |
| 93  | Dipropyl phthalate                                           | 131-16-8    | PZ76  | 3.35  | 3.739 | positive | 251.12779 | 80.03 | 5.00% |
| 94  | Bisphenol E                                                  | 2081-08-5   | BP26  | 2.29  | 3.75  | negative | 213.0921  | 84.75 | 7.08% |
| 95  | p-Benzylphenol                                               | 101-53-1    | BP41  | 2.8   | 3.76  | negative | 183.08154 | 86.07 | 4.65% |
| 96  | Bisphenol F bis(3-chloro-2-hydroxypropyl) ether              | 235741-59-0 | BP29  | 3.62  | 3.81  | positive | 402.12334 | 86.88 | 3.45% |
| 97  | Benzophenone-6                                               | 131-54-4    | UV10  | 3.27  | 3.81  | negative | 273.07685 | 86.78 | 4.61% |
| 98  | 7,9-di-tert-butyl-1-oxaspiro[4.5]deca-6,9-diene-2,8-dione    | 82304-66-3  | AO36  | 3.85  | 3.855 | positive | 277.17982 | 86.33 | 5.79% |
| 99  | Tris ( 2-butoxyethyl ) phosphate                             | 78-51-3     | PZ38  | 4.881 | 3.945 | positive | 399.25062 | 85.13 | 5.87% |
| 100 | 2 , 2'-dihydroxy-4-methoxybenzophenone                       | 131-53-3    | UV11  | 2.94  | 3.968 | negative | 243.06628 | 86.96 | 5.75% |
| 101 | Isopentyl p-methoxycinnamate                                 | 71617-10-2  | UV40  | 4.62  | 3.969 | positive | 249.14852 | 86.22 | 3.48% |

|     |                                                                                       |            |      |       |       |          |           |       |        |
|-----|---------------------------------------------------------------------------------------|------------|------|-------|-------|----------|-----------|-------|--------|
| 102 | 3,5-Di-tert-butyl-4-hydroxybenzyl alcohol                                             | 88-26-6    | AO48 | 3.13  | 3.99  | negative | 235.17035 | 85.14 | 2.35%  |
| 103 | Bisphenol A diglycidyl ether                                                          | 1675-54-3  | BP19 | 4.11  | 4.019 | positive | 358.20128 | 87.20 | 6.88%  |
| 104 | Bisphenol A                                                                           | 80-05-7    | BP14 | 2.38  | 4.04  | negative | 227.10775 | 87.39 | 3.43%  |
| 105 | Bisphenol A-d16                                                                       | 96210-87-6 | IS5  | 2.39  | 4.045 | negative | 241.19563 | 86.55 |        |
| 106 | 4-(1-phenylethyl)phenol                                                               | 1988-89-2  | BP55 | 3.08  | 4.05  | negative | 197.09719 | 77.64 | 3.86%  |
| 107 | Tributyl phosphate                                                                    | 126-73-8   | PZ35 | 4.12  | 4.085 | positive | 267.17197 | 77.68 | 6.44%  |
| 108 | Bisphenol A (3-chloro-2-hydroxypropyl) glycidyl ether                                 | 13836-48-1 | BP16 | 4.21  | 4.212 | positive | 394.17796 | 83.85 | 7.16%  |
| 109 | 2-(1,1-dimethylethyl)-4,6-dimethylphenol                                              | 1879-09-0  | AO31 | 3.52  | 4.242 | negative | 177.12849 | 74.46 | 4.03%  |
| 110 | Butyl glycolyl butyl phthalate                                                        | 85-70-1    | PZ67 | 4.38  | 4.252 | positive | 337.16456 | 72.87 | 8.23%  |
| 111 | Tris ( 1 , 3-dichloro-2-propyl ) phosphate                                            | 13674-87-8 | PZ37 | 4.26  | 4.28  | positive | 428.89119 | 75.30 | 19.64% |
| 112 | 2-hydroxy-5-methylbenzophenone                                                        | 1470-57-1  | UV14 | 3.63  | 4.292 | negative | 211.07645 | 87.30 | 5.92%  |
| 113 | 3',5'-Bis(tert-butyl)-4'-hydroxyacetophenone                                          | 14035-33-7 | AO38 | 3.903 | 4.317 | positive | 249.18491 | 94.40 | 3.10%  |
| 114 | p-cumylphenol                                                                         | 599-64-4   | BP42 | 3.35  | 4.34  | negative | 211.11284 | 78.00 | 21.71% |
| 115 | 1-chloro-3-(4-{2-[4-(3-chloro-2-hydroxypropoxy)phenyl]propan-2-yl}phenoxy)propan-2-ol | 4809-35-2  | BP18 | 4.26  | 4.405 | positive | 430.15464 | 80.15 | 3.74%  |
| 116 | 3,5-Di-tert-butyl-4-hydroxybenzoic acid                                               | 1421-49-4  | AO22 | 3.05  | 4.417 | negative | 249.14962 | 86.22 | 3.48%  |

|     |                                                     |             |       |       |       |          |           |       |       |
|-----|-----------------------------------------------------|-------------|-------|-------|-------|----------|-----------|-------|-------|
| 117 | trimethylopropane trimethacrylate                   | 3290-92-4   | AD8   | 4.22  | 4.466 | positive | 356.20676 | 86.81 | 5.76% |
| 118 | Diisobutyl phthalate                                | 84-69-5     | PZ52  | 4.33  | 4.469 | positive | 279.15909 | 85.14 | 5.87% |
| 119 | 3,5-di-tert-butyl-4-hydroxybenzaldehyde             | 1620-98-0   | AO25  | 3.82  | 4.472 | negative | 233.1547  | 87.20 | 2.29% |
| 120 | bisphenol B                                         | 77-40-7     | BP24  | 2.62  | 4.49  | negative | 241.1234  | 87.39 | 5.72% |
| 121 | Tetradecanamide                                     | 638-58-4    | LB3   | 4.82  | 4.561 | positive | 228.23219 | 87.01 | 4.60% |
| 122 | 3,5-di-tert-butyl-4-hydroxyanisole                  | 489-01-0    | AO21  | 4.25  | 4.602 | negative | 235.17035 | 87.11 | 4.59% |
| 123 | Dibutyl phthalate                                   | 84-74-2     | PZ50  | 4.15  | 4.628 | positive | 279.15909 | 85.48 | 5.85% |
| 124 | Mono(2-ethylhexyl) terephthalate                    | 155603-50-2 | PZ110 | 3.42  | 4.657 | negative | 277.14453 | 87.14 | 5.74% |
| 125 | Mono-(2-ethylhexyl)phthalate                        | 4376-20-9   | PZ60  | 2.53  | 4.657 | positive | 279.15909 | 86.62 | 4.62% |
| 126 | 3,5-(1,1-Dimethylethyl)-4-hydroxy-benzenepropanol   | 36294-23-2  | AO56  | 3.726 | 4.726 | negative | 263.20165 | 87.31 | 4.58% |
| 127 | 3,5-ditert-butylphenol                              | 1138-52-9   | AO32  | 3.83  | 4.76  | negative | 205.15979 | 87.40 | 6.87% |
| 128 | 2,4-di-tert-butylphenol                             | 96-76-4     | AO17  | 4.22  | 4.76  | negative | 205.15979 | 85.71 | 5.83% |
| 129 | 2,6-Di-tert-butylphenol                             | 128-39-2    | AO37  | 4.84  | 4.76  | negative | 205.15979 | 85.55 | 5.84% |
| 130 | bisphenol AF                                        | 1478-61-1   | BP22  | 2.67  | 4.77  | negative | 335.05122 | 83.96 | 7.15% |
| 131 | 3-(3,5-di-tert-butyl-4-hydroxyphenyl)propanoic acid | 20170-32-5  | AO26  | 3.52  | 4.842 | negative | 277.18092 | 84.77 | 2.36% |

|     |                                                        |            |       |       |       |          |           |       |       |
|-----|--------------------------------------------------------|------------|-------|-------|-------|----------|-----------|-------|-------|
| 132 | Di-trimethylol propane tetraacrylate                   | 94108-97-1 | AD7   | 4.7   | 4.858 | positive | 484.25411 | 80.73 | 2.48% |
| 133 | bisphenol Z                                            | 843-55-0   | BP38  | 3.13  | 4.915 | negative | 267.13905 | 87.20 | 3.44% |
| 134 | Methyl 3-(3,5-di-tert-butyl-4-hydroxyphenyl)propionate | 6386-38-5  | AO27  | 4.8   | 4.988 | negative | 291.19657 | 87.39 | 2.29% |
| 135 | 2,6-Di-tert-butyl-4-(ethoxymethyl)phenol               | 3080-84-0  | AO119 | 4.785 | 4.992 | negative | 263.20165 | 63.36 | 3.16% |
| 136 | Benzyl butyl phthalate                                 | 85-68-7    | PZ48  | 4.53  | 5.029 | positive | 313.14344 | 87.38 | 2.29% |
| 137 | Triphenyl phosphate                                    | 115-86-6   | PZ36  | 3.95  | 5.088 | positive | 327.07807 | 86.38 | 3.47% |
| 138 | p-Octylacetophenone                                    | 10541-56-7 | AO109 | 5.91  | 5.156 | positive | 233.18999 | 86.88 | 5.76% |
| 139 | Bisphenol AP                                           | 1571-75-1  | BP23  | 2.95  | 5.179 | negative | 289.1234  | 86.67 | 6.92% |
| 140 | Diisopentyl phthalate                                  | 605-50-5   | PZ66  | 5.31  | 5.202 | positive | 307.19039 | 83.67 | 5.98% |
| 141 | 4,4'-(4-Methylpentane-2,2-diyl)diphenol                | 6807-17-6  | BP10  | 3.24  | 5.22  | negative | 269.1547  | 93.20 | 3.44% |
| 142 | Di-tert-butyl-m-cresol                                 | 497-39-2   | AO39  | 4.63  | 5.273 | negative | 219.17544 | 87.36 | 2.29% |
| 143 | 4,6-di-tert-butyl-o-cresol                             | 616-55-7   | AO34  | 4.63  | 5.273 | negative | 219.17544 | 77.03 | 5.19% |
| 144 | 2,6-di-tert-butyl-p-cresol                             | 128-37-0   | AO95  | 5.26  | 5.273 | negative | 219.17544 | 87.31 | 6.87% |
| 145 | Diphenyl phthalate                                     | 84-62-8    | PZ75  | 4     | 5.296 | positive | 319.09649 | 85.96 | 3.49% |
| 146 | bumetizole                                             | 3896-11-5  | UV27  | 8.7   | 5.331 | negative | 314.10656 | 86.29 | 3.48% |



|     |                                                       |             |       |       |       |          |           |       |       |
|-----|-------------------------------------------------------|-------------|-------|-------|-------|----------|-----------|-------|-------|
| 147 | Ethyl 3-(3,5-di-tert-butyl-4-hydroxyphenyl)propanoate | 36294-24-3  | AO28  | 5.26  | 5.345 | negative | 305.21222 | 84.68 | 4.72% |
| 148 | 2-Ethylhexyl trans-4-methoxycinnamate                 | 83834-59-7  | UV38  | 6.42  | 5.38  | negative | 291.19547 | 84.77 | 3.54% |
| 149 | Dipentyl phthalate                                    | 131-18-0    | PZ54  | 5.6   | 5.517 | positive | 307.19039 | 84.66 | 2.36% |
| 150 | Dicyclohexyl phthalate                                | 84-61-7     | PZ51  | 5.855 | 5.579 | positive | 331.19039 | 87.40 | 3.43% |
| 151 | Nonylphenol                                           | 26543-97-5  | O10   | 5.01  | 5.582 | positive | 219.17544 | 87.24 | 6.88% |
| 152 | 2,6-di-tert-butyl-4-ethylphenol                       | 4130-42-1   | AO35  | 5.758 | 5.718 | negative | 233.19109 | 87.39 | 4.58% |
| 153 | Bisphenol TMC                                         | 129188-99-4 | BP47  | 4.13  | 5.79  | negative | 309.186   | 87.33 | 5.73% |
| 154 | Octrizole                                             | 123307-21-1 | UV30  | 7.95  | 5.903 | negative | 322.19249 | 86.80 | 6.91% |
| 155 | Oleamide                                              | 301-02-0    | LB1   | 6.6   | 5.977 | positive | 282.27914 | 91.20 | 4.61% |
| 156 | 4,4'-Isopropylidenedi-2,6-xylol                       | 5613-46-7   | BP12  | 3.54  | 6.099 | negative | 283.17035 | 80.67 | 2.48% |
| 157 | 4-benzoyl-4-methyldiphenyl sulfide                    | 83846-85-9  | UV23  | 6.39  | 6.135 | positive | 305.09946 | 85.79 | 2.33% |
| 158 | 2,2'-diallyl bisphenol A                              | 1745-89-7   | BP2   | 3.75  | 6.242 | negative | 307.17035 | 85.27 | 3.52% |
| 159 | 2,4,6-tri-tert-butylphenol                            | 732-26-3    | AO101 | 6.35  | 6.305 | negative | 261.22239 | 86.86 | 5.76% |
| 160 | Bisphenol BP                                          | 1844-01-5   | BP44  | 3.74  | 6.31  | negative | 351.13905 | 85.85 | 5.82% |
| 161 | Dihexyl phthalate                                     | 84-75-3     | PZ65  | 6.82  | 6.406 | positive | 335.22169 | 85.37 | 7.03% |

|     |                                                            |            |          |       |       |          |           |       |       |
|-----|------------------------------------------------------------|------------|----------|-------|-------|----------|-----------|-------|-------|
| 162 | Butyl octyl phthalate                                      | 84-78-6    | PZ93     | 6.89  | 6.406 | positive | 335.22169 | 86.07 | 5.81% |
| 163 | 2,4-Di-tert-butyl-6-(5-chlorobenzotriazol-2-yl) phenol     | 3864-99-1  | UV29/IS4 | 9.69  | 6.491 | negative | 356.15351 | 86.52 | 4.62% |
| 164 | Bisphenol G                                                | 127-54-8   | BP45     | 4.01  | 6.53  | negative | 311.20165 | 85.92 | 3.49% |
| 165 | Tri-p-cresyl phosphate                                     | 1330-78-5  | PZ44     | 5.628 | 6.628 | positive | 369.12502 | 86.52 | 4.62% |
| 166 | Bisphenol A dimethacrylate                                 | 3253-39-2  | BP21     | 6.04  | 6.637 | positive | 382.20128 | 82.11 | 7.31% |
| 167 | Bisphenol P                                                | 2167-51-3  | BP35     | 4.5   | 6.724 | negative | 345.186   | 82.09 | 4.87% |
| 168 | Octabenzone                                                | 1843-05-6  | UV20     | 8.15  | 6.724 | negative | 325.18092 | 87.80 | 3.45% |
| 169 | bis(2-ethylhexyl) fumarate                                 | 141-02-6   | PZ21     | 7.71  | 6.763 | positive | 341.26864 | 91.30 | 5.83% |
| 170 | 2-(2H-Benzotriazol-2-yl)-4,6-bis(2-methyl-2-butanyl)phenol | 25973-55-1 | UV28     | 9.54  | 6.766 | negative | 350.22379 | 85.52 | 3.51% |
| 171 | Di-(2-ethylhexyl) adipate                                  | 103-23-1   | PZ2      | 8.69  | 6.828 | positive | 371.31559 | 86.33 | 2.32% |
| 172 | Bisphenol M                                                | 13595-25-0 | BP34/IS2 | 4.28  | 7.01  | negative | 345.186   | 85.27 | 2.35% |
| 173 | Bisphenol PH                                               | 24038-68-4 | BP46     | 3.98  | 7.339 | negative | 379.17035 | 84.21 | 2.37% |
| 174 | butyryl trihexyl citrate                                   | 82469-79-2 | PZ124    | 9.656 | 7.34  | positive | 515.35785 | 77.83 | 3.85% |
| 175 | 2,2-methylenebis(6-t-butyl-p-cresol)                       | 119-47-1   | AO102    | 7.05  | 7.575 | negative | 339.23295 | 84.10 | 7.13% |
| 176 | 2,5-Bis(5-tert-butyl-benzoxazol-2-yl)thiophene             | 7128-64-5  | UV32     | 9.82  | 7.58  | positive | 431.17878 | 84.99 | 7.06% |

|     |                                                             |             |           |       |       |          |           |       |       |
|-----|-------------------------------------------------------------|-------------|-----------|-------|-------|----------|-----------|-------|-------|
| 177 | 6,6'-di-tert-butyl-4,4'-thiodi-m-cresol                     | 96-69-5     | AO97/IS3  | 5.22  | 7.672 | negative | 357.18937 | 84.39 | 7.11% |
| 178 | Bis(2-ethylhexyl) phthalate                                 | 117-81-7    | PZ49      | 8.676 | 8.025 | positive | 391.28429 | 83.85 | 2.39% |
| 179 | DEHP-3,4,5,6-d4                                             | 93951-87-2  | PZ123/IS1 | 8.68  | 8.025 | positive | 395.30939 | 87.40 | 6.87% |
| 180 | Octyl 3-(3,5-di-tert-butyl-4-hydroxyphenyl)propanoate       | 125643-61-0 | AO23      | 8.59  | 8.09  | negative | 389.30612 | 79.10 | 5.85% |
| 181 | Diisononyl hexahydrophthalate                               | 166412-78-8 | PZ56      | 10.24 | 8.183 | positive | 425.36254 | 74.80 | 4.71% |
| 182 | Dioctyl phthalate                                           | 117-84-0    | PZ71      | 9.035 | 8.185 | positive | 391.28429 | 67.80 | 3.44% |
| 183 | 2,2-methylenebis(4-ethyl-6-tert-butylphenol)                | 88-24-4     | AO100     | 8     | 8.464 | negative | 367.26425 | 73.60 | 4.78% |
| 184 | 1,2-Bis(3,5-di-tert-butyl-4-hydroxyhydrocinnamoyl)hydrazine | 32687-78-8  | AO5       | 6.43  | 8.511 | negative | 551.38543 | 75.90 | 5.56% |
| 185 | 1,10-bis(2-ethylhexyl) decanedioate                         | 122-62-3    | PZ104     | 10.24 | 8.606 | positive | 444.40474 | 72.99 | 2.74% |
| 186 | Diisononyl phthalate                                        | 68515-48-0  | PZ63      | 9.46  | 8.759 | positive | 419.31559 | 67.90 | 3.92% |
| 187 | Tris(2-ethylhexyl) phosphate                                | 78-42-2     | PZ41      | 9.984 | 9.182 | positive | 435.35977 | 69.10 | 2.59% |
| 188 | Bis[2,4-bis(2-methyl-2-propanyl)phenyl] hydrogen phosphate  | 69284-93-1  | AO41      | 1.87  | 9.232 | negative | 473.2826  | 63.10 | 2.52% |
| 189 | 2,2',6,6'-Tetra-tert-butyl-4,4'-methylenediphenol           | 118-82-1    | AO94      | 9.1   | 9.638 | negative | 423.32685 | 59.10 | 2.51% |
| 190 | Diisodecyl phthalate                                        | 26761-40-0  | PZ62      | 10.35 | 9.648 | positive | 447.34569 | 69.20 | 5.01% |
| 191 | Bis(2-propylheptyl) phthalate                               | 53306-54-0  | PZ53      | 10.34 | 9.804 | positive | 447.34689 | 61.20 | 2.44% |

|     |                                                                             |            |       |        |        |          |           |       |       |
|-----|-----------------------------------------------------------------------------|------------|-------|--------|--------|----------|-----------|-------|-------|
| 192 | N,N'-(Hexane-1,6-diyl)bis(3-(3,5-di-tert-butyl-4-hydroxyphenyl)propanamide) | 23128-74-7 | AO12  | 7.269  | 9.813  | negative | 635.47933 | 62.70 | 4.83% |
| 193 | Naugard DLTDP                                                               | 123-28-4   | AO4   | 11.96  | 10.499 | positive | 515.41286 | 57.80 | 3.62% |
| 194 | Alpha tocopherol                                                            | 59-02-9    | AO108 | 10.78  | 10.508 | negative | 429.3738  | 33.20 | 6.10% |
| 195 | Diocetyldiphenylamine                                                       | 101-67-7   | AO111 | 10.54  | 10.664 | positive | 394.34683 | 59.10 | 7.04% |
| 196 | Diundecyl phthalate                                                         | 3648-20-2  | PZ72  | 11.4   | 10.852 | positive | 475.37819 | 54.80 | 4.59% |
| 197 | Tris(2-ethylhexyl) benzene-1,2,4-tricarboxylate                             | 3319-31-1  | PZ122 | 11.8   | 11.051 | positive | 547.39932 | 53.10 | 2.34% |
| 198 | Irganox 259                                                                 | 35074-77-2 | AO8   | 10.48  | 11.271 | negative | 637.44736 | 43.20 | 2.36% |
| 199 | tris isocyanuric acid                                                       | 40601-76-1 | AO116 | 10.05  | 11.615 | positive | 717.45856 | 47.90 | 7.18% |
| 200 | Ditridecyl phthalate                                                        | 119-06-2   | PZ78  | 12.41  | 12.63  | positive | 531.44079 | 39.10 | 4.60% |
| 201 | Hostanox O3                                                                 | 32509-66-3 | AO6   | 7.39   | 12.639 | negative | 793.46849 | 33.70 | 6.88% |
| 202 | irganox 3114                                                                | 27676-62-6 | AO3   | 11.97  | 13.169 | positive | 801.55246 | 29.70 | 3.85% |
| 203 | 2,4-Bis(octylthio)-6-(4-hydroxy-3,5-ditert-butylanilino)-1,3,5-triazine     | 991-84-4   | AO16  | 12.198 | 13.372 | negative | 587.3823  | 33.90 | 2.48% |
| 204 | irganox 1330                                                                | 1709-70-2  | AO2   | 12.8   | 18.149 | positive | 792.62892 | 14.90 | 3.68% |
| 205 | irganox 1010                                                                | 6683-19-8  | AO1   | 13.2   | 19.288 | positive | 1194.8179 | 13.70 | 3.76% |

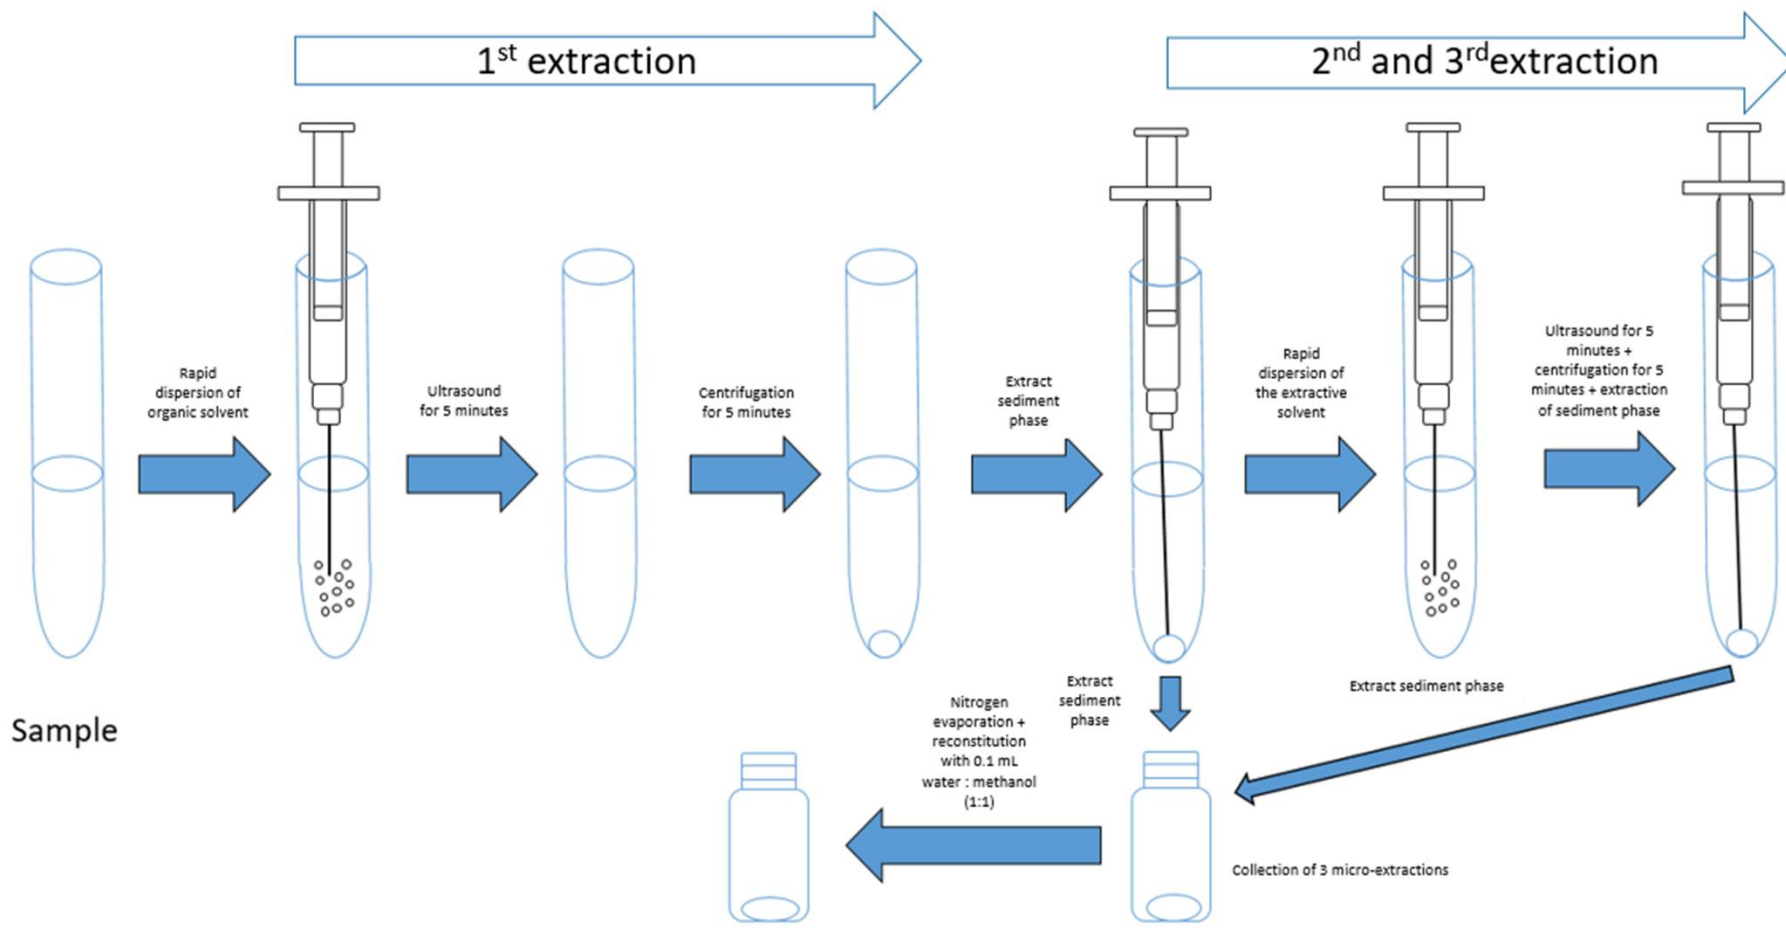

**Figure S1:** A demonstration of ultrasound-assisted and multiple extraction points dispersive liquid-liquid microextraction (UA-DLLME)

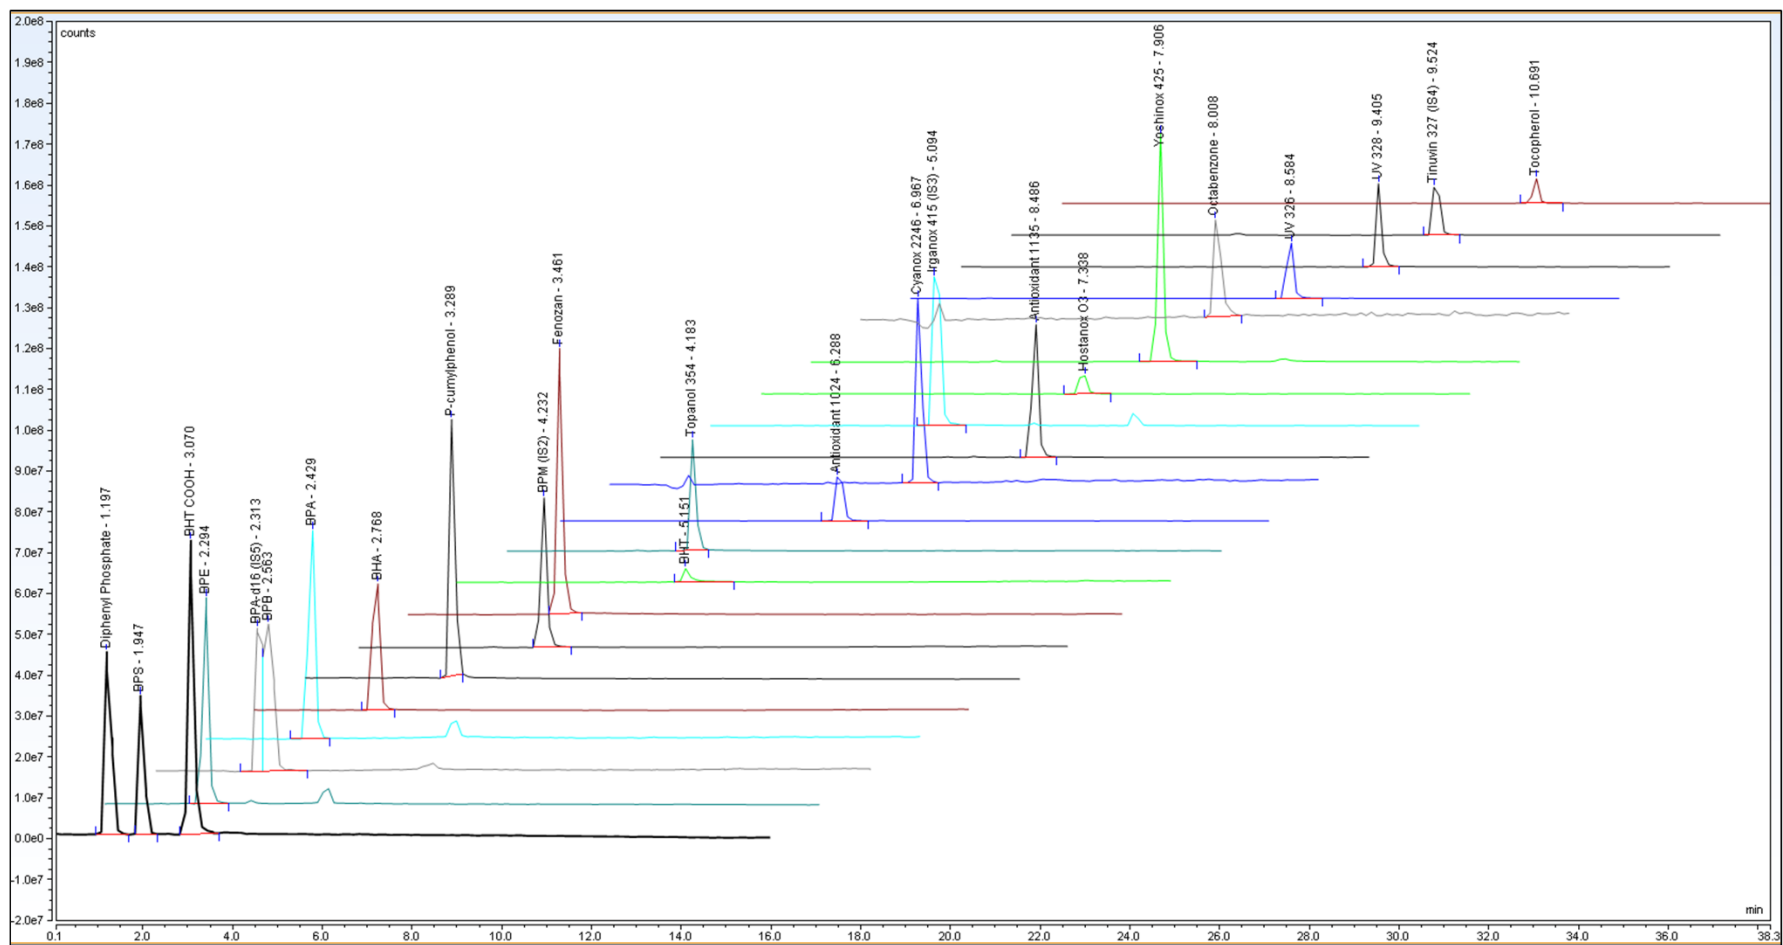

**Figure S2:** Chromatogram compiling negative mode compounds after DLLME sample preparation procedure

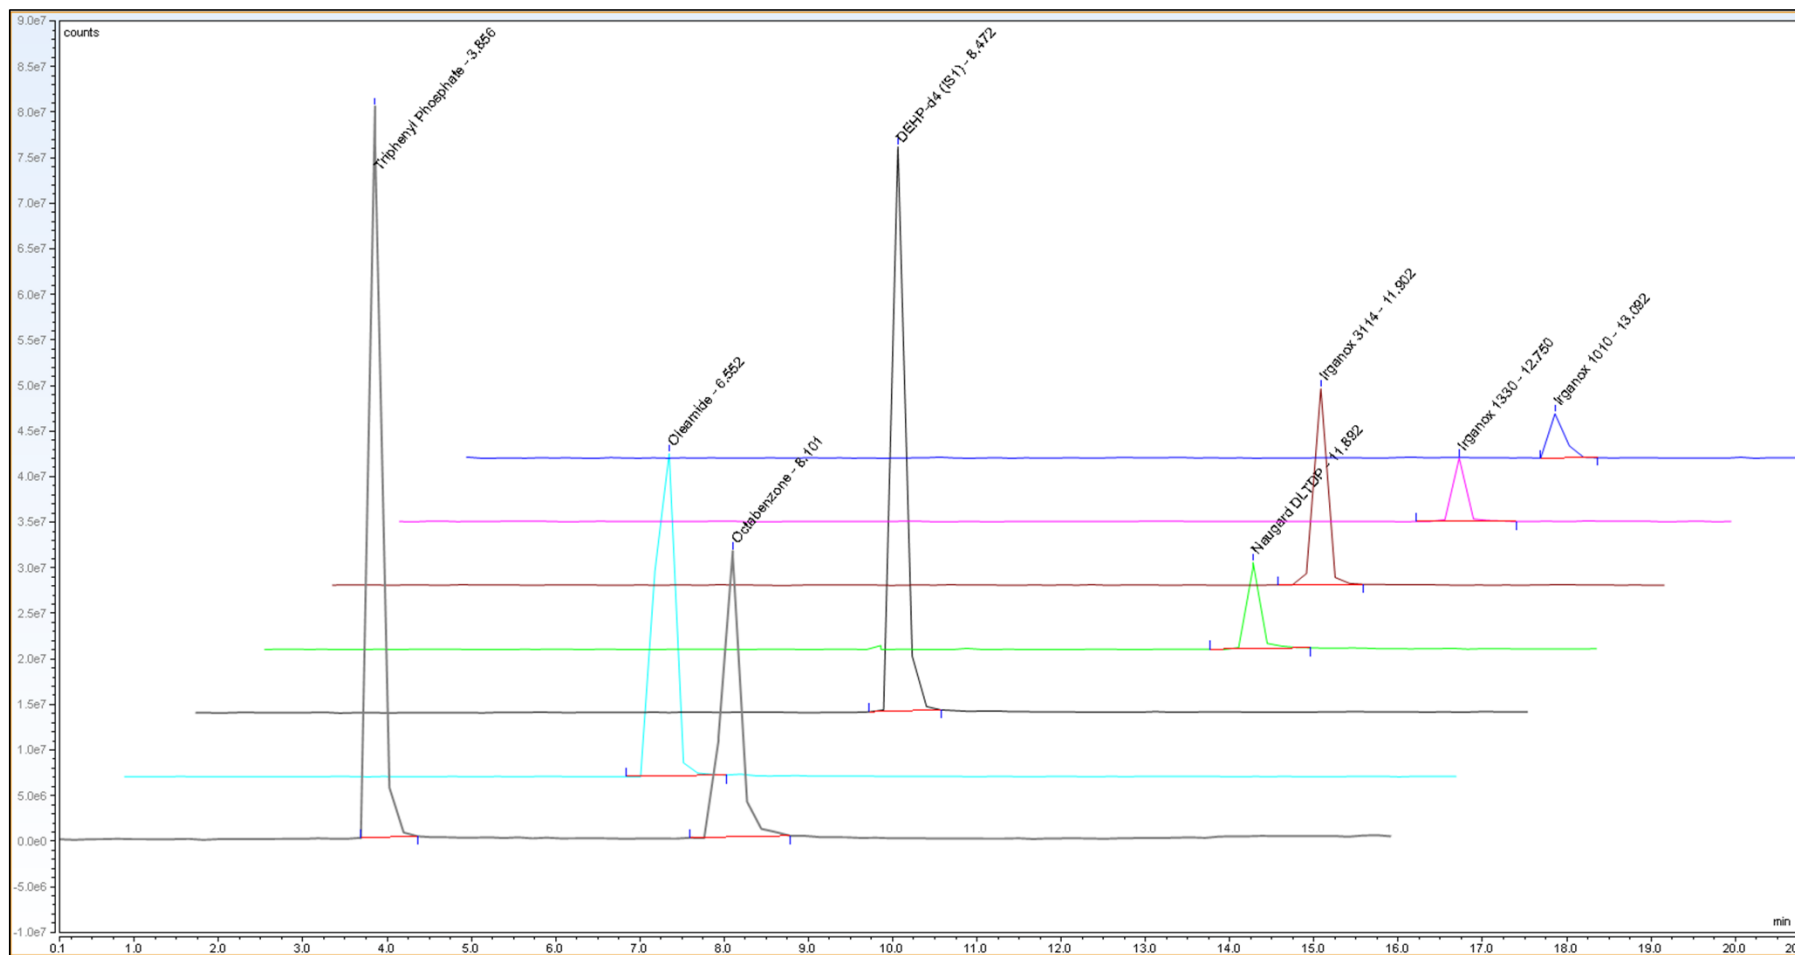

**Figure S3:** Chromatogram compiling positive mode compounds after DLLME sample preparation procedure

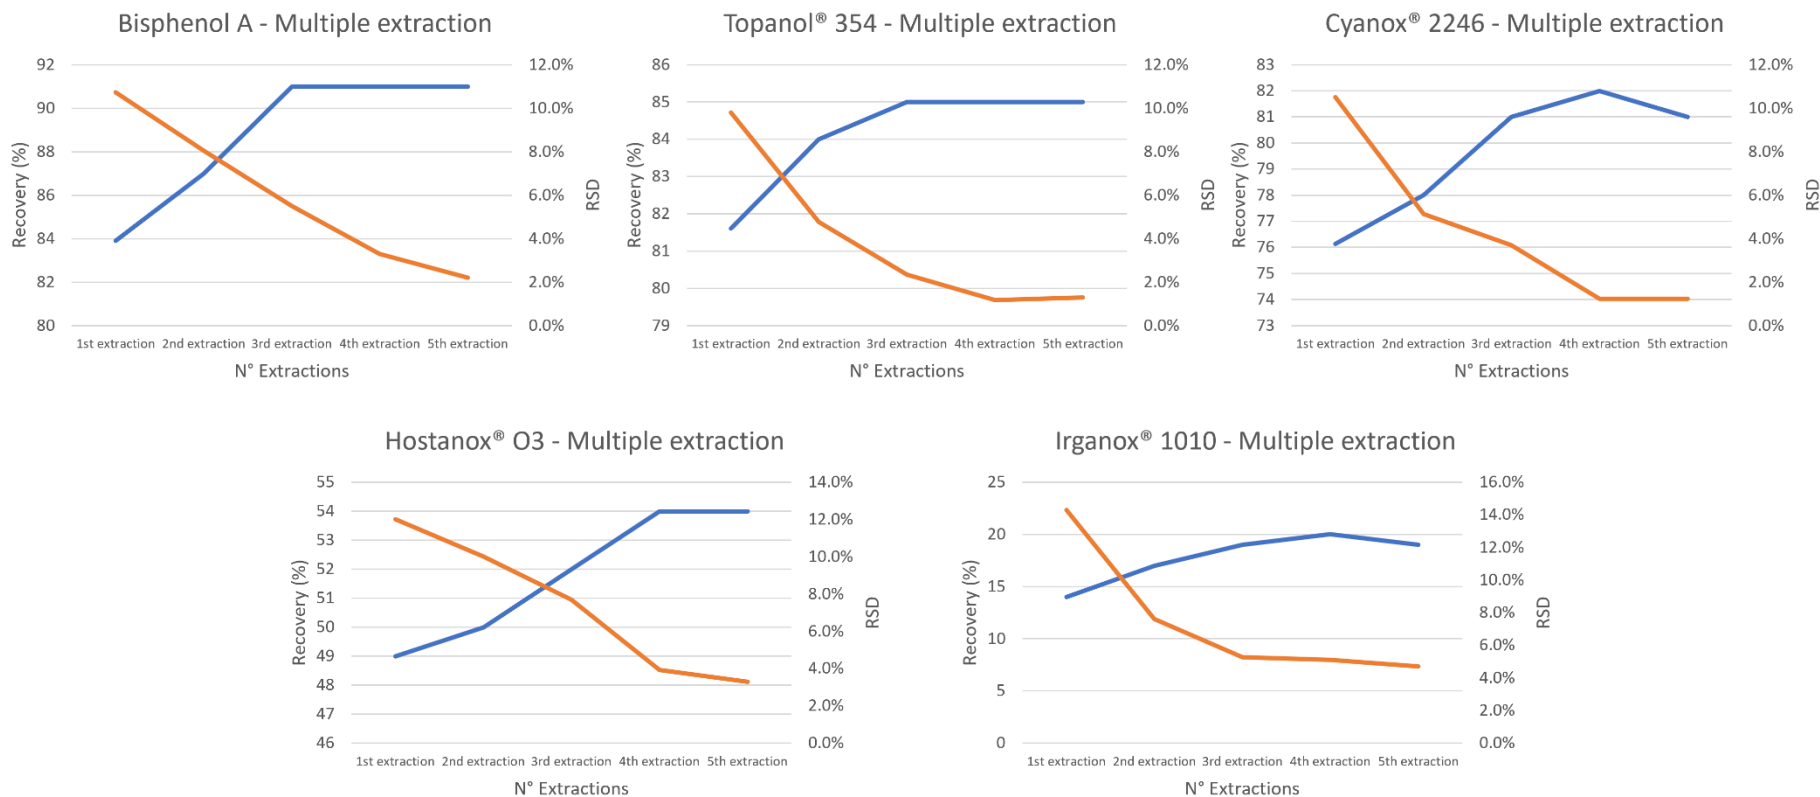

**Figure S4:** Description of results obtained from multiple extractions and the appearance of the asymptotic curve for all 5 representative sets of compounds, and vice versa, the decrease of the RSD in the form of a reverse asymptotic curve.



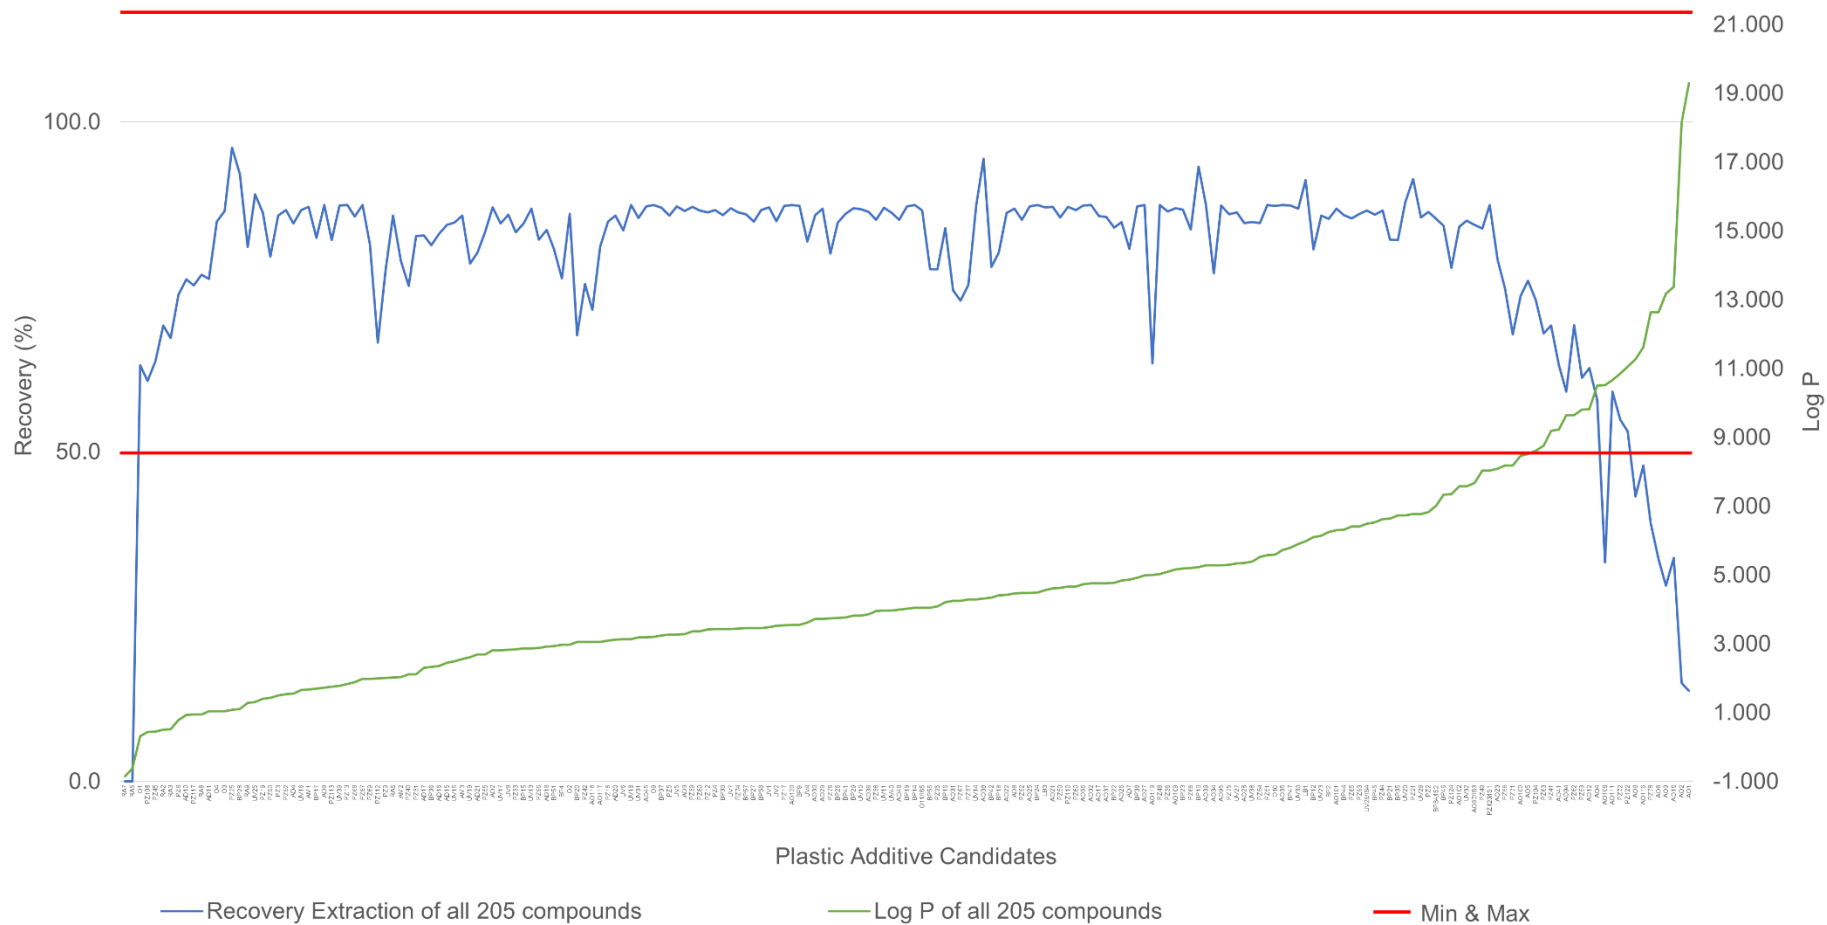

**Figure S5:** Graphic diagram describing the extraction recovery of all 205 compounds (%) via UA-DLLME in terms of their log P.
