# Supplementary material for: Development of a generic sample preparation method using dispersive liquid–liquid microextraction for the monitoring of leachable compounds in hospital pharmacy-prepared prefilled drug products
Source: Royal Society of Chemistry journal article supplement (doi:10.1039/d3ay02234j), 2024-01-01
Supplement: d3ay02234j8.pdf [file d3ay02234j8.pdf]

**Table S1.** Physical-chemical properties and mass parameters of all standards used in the development of DLLME

| N° | Name of Compound                                                                        | CAS                | Log P | pKa         | Retention time (minutes) | Polarity | Monoisotopic mass (Da) | m/z        | Adduct | Category                                      | Functional group |
|----|-----------------------------------------------------------------------------------------|--------------------|-------|-------------|--------------------------|----------|------------------------|------------|--------|-----------------------------------------------|------------------|
| 1  | Diphenyl hydrogen phosphate                                                             | 838-85-7           | 1.34  | 0.87        | 0.43                     | Negative | 250.03949              | 249.03222  | -H     | Degradant of plasticizer and flame retardants | phosphate        |
| 2  | 4,4'-Sulfonyldiphenol                                                                   | 80-09-1            | 1.83  | 7.42        | 0.77                     | Negative | 250.029984             | 249.0227   | -H     | Monomer and epoxy degradant                   | Phenol           |
| 3  | 4,4'-Methylenediphenol                                                                  | 620-92-8           | 2.73  | 9.84        | 1.27                     | Negative | 200.083725             | 199.07645  | -H     | Monomer and epoxy degradant                   | Phenol           |
| 4  | 4-Methoxy-2-(2-methyl-2-propanyl)phenol - 4-methoxy-3-(2-methyl-2-propanyl)phenol (1:1) | 121-00-6 / 88-32-4 | 3     | 10.57/10.01 | 2.24                     | Negative | 180.115036             | 179.10775  | -H     | Antioxidant                                   | Phenol           |
| 5  | 4,4'-(1,1-Ethanediy)ldiphenol                                                           | 05.08.2081         | 3.08  | 9.81        | 1.63                     | Negative | 214.09938              | 213.0921   | -H     | Monomer and epoxy degradant                   | Phenol           |
| 6  | 4,4'-(2,2-Propanediy)ldiphenol                                                          | 80-05-7            | 3.43  | 9.78        | 1.85                     | Negative | 228.115036             | 227.10775  | -H     | Monomer and epoxy degradant                   | Phenol           |
| 7  | 4,4'-(2,2-Butanediy)ldiphenol                                                           | 77-40-7            | 3.96  | 9.77        | 2.46                     | Negative | 241.1234               | 242.130676 | -H     | Monomer and epoxy degradant                   | Phenol           |
| 8  | Phenyl phosphate                                                                        | 115-86-6           | 4.1   | -           | 4                        | Positive | 326.070801             | 327.07807  | +H     | Flame retardant / plasticizer                 | Phosphate        |
| 9  | 4-(2-Phenyl-2-propanyl)phenol                                                           | 599-64-4           | 4.17  | 10.08       | 3.16                     | Negative | 212.120117             | 211.11284  | -H     | Degradant of Bisphenol A                      | Phenol           |

|    |                                                                          |            |      |       |      |          |            |           |    |                                 |                 |
|----|--------------------------------------------------------------------------|------------|------|-------|------|----------|------------|-----------|----|---------------------------------|-----------------|
| 10 | 3-[4-Hydroxy-3,5-bis(2-methyl-2-propanyl)phenyl]propanoic acid           | 20170-32-5 | 4.48 | 4.79  | 3.34 | Negative | 278.188202 | 277.18092 | -H | Monomer of complex antioxidants | Carboxylic acid |
| 11 | 4-Methoxy-2,6-bis(2-methyl-2-propanyl)phenol                             | 489-01-0   | 4.69 | 11.21 | 4.04 | Negative | 236.177628 | 235.17035 | -H | Antioxidant                     | Phenol          |
| 12 | B4-Hydroxy-3,5-bis(2-methyl-2-propanyl)benzoic acid                      | 1421-49-4  | 4.8  | 4.36  | 2.9  | Negative | 250.156891 | 249.14962 | -H | Oxidation of Bisphenol A        | Carboxylic acid |
| 13 | 4-Methyl-2,6-bis(2-methyl-2-propanyl)phenol                              | 128-37-0   | 5.32 | 11.6  | 4.72 | Negative | 220.182709 | 219.17544 | -H | Antioxidant                     | Phenol          |
| 14 | 4,4'-(1,3-Phenylenedi-2,2-propanediyl)diphenol                           | 13595-25-0 | 6.12 | 9.78  | 4.37 | Negative | 346.193268 | 345.186   | -H | Monomer and epoxy degradant     | Phenol          |
| 15 | 2,4,6-Tris(2-methyl-2-propanyl)phenol                                    | 732-26-3   | 6.55 | 11.49 | 5.4  | Negative | 262.229675 | 261.22239 | -H | Antioxidant                     | Phenol          |
| 16 | 2-(5-Chloro-2H-benzotriazol-2-yl)-4-methyl-6-(2-methyl-2-propanyl)phenol | 05.11.3896 | 6.58 | 10.08 | 6.3  | Negative | 315.113831 | 314.10656 | -H | UV absorber                     | Phenol          |
| 17 | 2,2'-Methylenebis[4-methyl-6-(2-methyl-2-propanyl)phenol]                | 119-47-1   | 7.03 | 8.92  | 5.8  | Negative | 340.240234 | 339.23295 | -H | Antioxidant                     | Phenol          |
| 18 | (9Z)-9-Octadecenamide                                                    | 301-02-0   | 7.07 | -     | 6.47 | Positive | 281.271851 | 282.27914 | +H | Lubricant                       | Amide           |

|    |                                                                                                                                 |             |       |       |      |          |            |           |      |             |        |
|----|---------------------------------------------------------------------------------------------------------------------------------|-------------|-------|-------|------|----------|------------|-----------|------|-------------|--------|
| 19 | [2-Hydroxy-4-(octyloxy)phenyl](phenyl)methanone                                                                                 | 1843-05-6   | 7.36  | 7.07  | 6.14 | Negative | 326.188202 | 325.18092 | -H   | UV absorber | Phenol |
| 20 | 4,4'-Sulfanediybis[5-methyl-2-(2-methyl-2-propanyl)phenol]                                                                      | 96-69-5     | 7.63  | 9.69  | 5.04 | Negative | 358.196655 | 357.18937 | -H   | Antioxidant | Phenol |
| 21 | 2,2'-Methylenebis[4-ethyl-6-(2-methyl-2-propanyl)phenol]                                                                        | 88-24-4     | 8.09  | 8.88  | 6.16 | Negative | 368.271515 | 367.26425 | -H   | Antioxidant | Phenol |
| 22 | 2-(2H-Benzotriazol-2-yl)-4,6-bis(2-methyl-2-butanyl)phenol                                                                      | 25973-55-1  | 8.28  | 9.94  | 6.69 | Negative | 351.231049 | 350.22379 | -H   | UV absorber | Phenol |
| 23 | 3-[4-Hydroxy-3,5-bis(2-methyl-2-propanyl)phenyl]-N'-[3-[4-hydroxy-3,5-bis(2-methyl-2-propanyl)phenyl]propanoyl]propanehydrazide | 32687-78-8  | 8.37  | 10.37 | 6.5  | Negative | 552.3927   | 551.38543 | -H   | Antioxidant | Amide  |
| 24 | Octyl 3-[4-hydroxy-3,5-bis(2-methyl-2-propanyl)phenyl]propanoate                                                                | 125643-61-0 | 8.62  | 10.75 | 6.38 | Negative | 390.313385 | 389.30612 | -H   | Antioxidant | Ester  |
| 25 | 1,3,5-Tris[4-hydroxy-3,5-bis(2-methyl-2-propanyl)benzyl]-1,3,5-triazinane-2,4,6-trione                                          | 27676-62-6  | 10.34 | -     | 12   | Positive | 783.518616 | 801.55246 | +NH4 | Antioxidant | Phenol |

|    |                                                                                                       |            |       |      |      |          |            |           |      |             |        |
|----|-------------------------------------------------------------------------------------------------------|------------|-------|------|------|----------|------------|-----------|------|-------------|--------|
| 26 | 1,2-EthanediyI bis(3,3-bis[4-hydroxy-3-(2-methyl-2-propanyl)phenyl]butanoate)                         | 32509-66-3 | 11.62 | 9.52 | 6.07 | Negative | 794.475769 | 793.46849 | -H   | Antioxidant | Ester  |
| 27 | (2R)-2,5,7,8-Tetramethyl-2-[(4R,8R)-4,8,12-trimethyltridecyl]-6-chromanol                             | 59-02-9    | 11.9  | 10.8 | 7.31 | Negative | 430.381073 | 429.3738  | -H   | Antioxidant | Phenol |
| 28 | Didodecyl 3,3'-sulfanediyldipropanoate                                                                | 123-28-4   | 12.88 | -    | 12   | Positive | 514.405579 | 515.41286 | +H   | Antioxidant | Thiol  |
| 29 | 4,4',4"-[(2,4,6-Trimethylbenzene-1,3,5-triyl)tris(methylene)]tris[2,6-bis(2-methyl-2-propanyl)phenol] | 1709-70-2  | 17.49 | -    | 13   | Positive | 774.595093 | 792.62892 | +NH4 | Antioxidant | Phenol |

|    |                                                                                                                                                                                                                     |            |       |       |      |          |             |           |      |                             |               |
|----|---------------------------------------------------------------------------------------------------------------------------------------------------------------------------------------------------------------------|------------|-------|-------|------|----------|-------------|-----------|------|-----------------------------|---------------|
| 30 | 3-((3-[4-Hydroxy-3,5-bis(2-methyl-2-propanyl)phenyl]propanoyl)oxy)-2,2-bis(((3-[4-hydroxy-3,5-bis(2-methyl-2-propanyl)phenyl]propanoyl)oxy)methyl)propyl 3-[4-hydroxy-3,5-bis(2-methyl-2-propanyl)phenyl]propanoate | 6683-19-8  | 18.89 | -     | 13   | Positive | 1176.784058 | 1194.8179 | +NH4 | Antioxidant                 | Ester         |
| 31 | Bis(2-ethylhexyl)phthalate-3,4,5,6-d4                                                                                                                                                                               | 93951-87-2 | 8.71  | -     | 8.68 | Positive | 394.3021167 | 395.30939 | +H   | Plasticizer                 | Ester         |
| 32 | Tinuvin® 327                                                                                                                                                                                                        | 3864-99-1  | 6.49  | 10.07 | 9.69 | Negative | 357.1607901 | 356.15351 | -H   | UV Stabilizer               | Benzotriazole |
| 33 | Bisphenol A-d16                                                                                                                                                                                                     | 96210-87-6 | 4.04  | 9.78  | 2.39 | Negative | 244.2154577 | 241.19563 | -H   | Monomer and epoxy degradant | Phenol        |
