# Supplementary material for: Development of a generic sample preparation method using dispersive liquid–liquid microextraction for the monitoring of leachable compounds in hospital pharmacy-prepared prefilled drug products
Source: Royal Society of Chemistry journal article supplement (doi:10.1039/d3ay02234j), 2024-01-01
Supplement: d3ay02234j9.pdf [file d3ay02234j9.pdf]

**Table S2.** Compilation of all information obtained after DLLME application on all products in the in-house database (DELTA). Information include some physical chemical properties, mass spectral information and DLLME recovery and relative standard deviation (RSD).

| N° | Name of Compounds                      | CAS        | Product Code | Retention time (mins) | Log P  | Polarity | M/Z       | DLLME Recovery (%) | RSD   |
|----|----------------------------------------|------------|--------------|-----------------------|--------|----------|-----------|--------------------|-------|
| 1  | N-methylformamide                      | 123-39-7   | RA7          | 2                     | -0.855 | positive | 60.04439  | 0.00               | 2.62% |
| 2  | N,N-Dimethylformamide                  | 68-12-2    | RA5          | 1.99                  | -0.632 | positive | 74.06004  | 0.00               | 7.02% |
| 3  | Caprolactam                            | 105-60-2   | O1           | 2.2                   | 0.31   | positive | 114.09134 | 63.10              | 3.45% |
| 4  | Methylbutanedioic acid, dimethyl ester | 1604-11-1  | PZ108        | 2.21                  | 0.436  | positive | 161.08084 | 60.70              | 6.02% |
| 5  | Diethyl hydrogen phosphate             | 598-02-7   | PZ45         | 1.22                  | 0.449  | positive | 155.04677 | 63.70              | 6.87% |
| 6  | Hydroxyphenylacetamide                 | 17194-82-0 | RA2          | 1.98                  | 0.5    | positive | 152.0706  | 69.10              | 6.87% |
| 7  | N-butylacetamide                       | 1119-49-9  | RA3          | 2.02                  | 0.517  | positive | 116.10699 | 67.20              | 5.74% |
| 8  | Dimethyl adipate                       | 627-93-0   | PZ8          | 2.2                   | 0.782  | positive | 175.09648 | 73.80              | 2.30% |
| 9  | methacrylic acid                       | 79-41-4    | AD10         | 2.09                  | 0.928  | negative | 85.0295   | 76.10              | 2.31% |
| 10 | 2-Hydroxyethyl terephthalate           | 1137-99-1  | PZ117        | 1.66                  | 0.944  | negative | 209.04555 | 75.20              | 5.87% |
| 11 | N-cyclohexylformamide                  | 766-93-8   | RA8          | 2.24                  | 0.944  | positive | 128.10699 | 76.80              | 4.60% |
| 12 | 2-hydroxypropyl methacrylate           | 27813-02-1 | AD11         | 2.24                  | 1.034  | positive | 145.08592 | 76.20              | 6.92% |

|    |                                            |            |      |       |       |          |           |       |       |
|----|--------------------------------------------|------------|------|-------|-------|----------|-----------|-------|-------|
| 13 | Vinyl caprolacam                           | 2235-00-9  | O4   | 2.45  | 1.038 | positive | 140.10699 | 84.90 | 5.89% |
| 14 | Caprolactone                               | 502-44-3   | O3   | 2.21  | 1.039 | positive | 115.07536 | 86.49 | 4.62% |
| 15 | 3-ethyl-3-methylpentanedioic acid          | 5345-01-7  | PZ25 | 2.234 | 1.078 | positive | 175.0965  | 96.10 | 3.93% |
| 16 | Bisphenol F Bis(2,3-dihydroxypropyl) Ether | 72406-26-9 | BP28 | 2.08  | 1.109 | positive | 366.19111 | 92.10 | 7.26% |
| 17 | N-butylformamide                           | 111-36-4   | RA9  | 2.018 | 1.281 | positive | 102.09134 | 81.00 | 3.70% |
| 18 | Benzotriazole                              | 95-14-7    | UV25 | 2.08  | 1.301 | positive | 120.05562 | 89.00 | 2.57% |
| 19 | Dimethyl-1,4-cyclohexanedicarboxylate      | 94-60-0    | PZ19 | 2.478 | 1.405 | positive | 201.11214 | 86.23 | 6.96% |
| 20 | Phthalic anhydride                         | 85-44-9    | PZ90 | 2.94  | 1.423 | positive | 149.02332 | 79.56 | 2.51% |
| 21 | Diethyl adipate                            | 141-28-6   | PZ3  | 2.581 | 1.496 | positive | 203.12779 | 85.78 | 5.83% |
| 22 | Phthalide                                  | 87-41-2    | PZ92 | 2.11  | 1.528 | positive | 135.04406 | 86.65 | 4.62% |
| 23 | pentaerythritol triacrylate                | 3524-68-3  | AD4  | 2.21  | 1.554 | positive | 299.11253 | 84.57 | 7.09% |
| 24 | 4 , 4'-diaminobenzophenone                 | 611-98-3   | UV16 | 1.97  | 1.66  | positive | 213.10224 | 86.61 | 6.93% |
| 25 | Methylparaben                              | 99-76-3    | AM1  | 2.29  | 1.673 | negative | 151.04007 | 87.12 | 3.44% |
| 26 | Bisphenol A bis(2,3-dihydroxypropyl) ether | 5581-32-8  | BP17 | 2.92  | 1.696 | positive | 394.22241 | 82.42 | 3.64% |
| 27 | tetrahydrofurfuryl methacrylate            | 2455-24-5  | AD9  | 2.52  | 1.726 | positive | 171.10157 | 87.40 | 4.58% |

|    |                                                   |            |       |       |       |          |           |       |       |
|----|---------------------------------------------------|------------|-------|-------|-------|----------|-----------|-------|-------|
| 28 | Bis(4-hydroxybutyl) terephthalate                 | 23358-95-4 | PZ113 | 2.23  | 1.755 | positive | 311.14891 | 82.05 | 4.88% |
| 29 | 4,4'-bis(Diethylamino)benzophenone                | 90-93-7    | UV39  | 5.92  | 1.775 | positive | 325.22744 | 87.32 | 5.73% |
| 30 | Azelaic acid                                      | 123-99-9   | PZ13  | 2.59  | 1.824 | positive | 189.11214 | 87.39 | 4.58% |
| 31 | Bis(2-methoxyethyl) phthalate                     | 117-82-8   | PZ68  | 2.35  | 1.886 | positive | 283.11761 | 85.66 | 3.50% |
| 32 | Dimethyl isophthalate                             | 1459-93-4  | PZ97  | 2.5   | 1.98  | positive | 195.06519 | 87.40 | 6.87% |
| 33 | Dimethyl phthalate                                | 131-11-3   | PZ69  | 2.29  | 1.98  | positive | 195.06519 | 81.38 | 7.37% |
| 34 | Monoethyl terephthalate                           | 713-57-5   | PZ112 | 2.54  | 1.991 | positive | 195.06519 | 66.50 | 9.02% |
| 35 | 2-Methyl-5-methylenehexanoic acid, dimethyl ester | 4513-62-6  | PZ9   | 2.53  | 2.01  | positive | 201.11214 | 77.59 | 2.58% |
| 36 | N,N-Dibutylformamide                              | 761-65-9   | RA6   | 2.85  | 2.016 | positive | 158.15394 | 85.75 | 7.00% |
| 37 | Ethylparaben                                      | 120-47-8   | AM2   | 2.41  | 2.03  | negative | 165.05572 | 78.89 | 5.07% |
| 38 | Tris ( 2-chloroethyl ) phosphate                  | 115-96-8   | PZ40  | 2.467 | 2.107 | positive | 284.96116 | 75.12 | 5.32% |
| 39 | Nonanedioic acid, dimethyl ester                  | 1732-10-1  | PZ31  | 2.859 | 2.116 | positive | 217.14344 | 82.68 | 7.26% |
| 40 | tetraethyleneglycol dimethacrylate                | 109-17-1   | AD17  | 2.91  | 2.303 | positive | 348.20168 | 82.76 | 7.25% |
| 41 | bisphenol S                                       | 80-09-1    | BP36  | 1.974 | 2.32  | negative | 249.0227  | 81.28 | 3.69% |
| 42 | triethyleneglycol dimethacrylate                  | 109-16-0   | AD16  | 2.91  | 2.35  | positive | 304.17546 | 83.04 | 3.61% |

|    |                                                  |            |      |      |       |          |           |       |       |
|----|--------------------------------------------------|------------|------|------|-------|----------|-----------|-------|-------|
| 43 | ethyleneglycol dimethacrylate                    | 97-90-5    | AD15 | 2.78 | 2.444 | positive | 216.12303 | 84.41 | 2.37% |
| 44 | 2-hydroxybenzophenone                            | 117-99-7   | UV15 | 3.24 | 2.486 | negative | 197.0608  | 84.69 | 7.08% |
| 45 | Propylparaben                                    | 94-13-3    | AM3  | 2.6  | 2.552 | negative | 179.07137 | 85.80 | 5.83% |
| 46 | 4-aminobenzophenone                              | 1137-41-3  | UV19 | 2.31 | 2.604 | positive | 198.09134 | 78.51 | 2.55% |
| 47 | Neopentyl glycol diacrylate                      | 2223-82-7  | AD21 | 2.8  | 2.684 | positive | 213.11214 | 80.18 | 2.49% |
| 48 | Diethyl phthalate                                | 84-66-2    | PZ55 | 2.61 | 2.694 | positive | 223.09649 | 83.43 | 4.79% |
| 49 | Tripropylene glycol diacrylate                   | 42978-66-5 | AD2  | 2.98 | 2.809 | positive | 318.19111 | 87.07 | 4.59% |
| 50 | 4-hydroxy-2', 4'-dimethoxybenzophenone           | 41351-30-8 | UV17 | 2.35 | 2.814 | negative | 257.08193 | 84.58 | 4.73% |
| 51 | 4,4'-Dihydroxy-benzophenone                      | 611-99-4   | UV8  | 2    | 2.825 | negative | 213.05572 | 85.93 | 3.49% |
| 52 | Nonanedioic acid, diethyl ester                  | 624-17-9   | PZ33 | 3.55 | 2.83  | positive | 245.17474 | 83.25 | 3.60% |
| 53 | Bisphenol A (2,3-dihydroxypropyl) glycidyl ether | 76002-91-0 | BP15 | 2.98 | 2.858 | positive | 376.21185 | 84.58 | 4.73% |
| 54 | 2, 3, 4, 4'-tetrahydroxybenzophenone             | 31127-54-5 | UV13 | 2.93 | 2.868 | negative | 245.04555 | 86.85 | 3.45% |
| 55 | Monoisobutyl phthalate                           | 30833-53-5 | PZ96 | 1.99 | 2.879 | positive | 223.09649 | 82.11 | 4.87% |
| 56 | 1,3-butanediol dimethacrylate                    | 1189-08-8  | AD18 | 3.16 | 2.92  | positive | 227.12779 | 83.63 | 2.39% |
| 57 | Diphenyl sulfone                                 | 127-63-9   | BP51 | 2.44 | 2.928 | positive | 219.04743 | 80.70 | 7.44% |

|    |                                                                                   |             |       |       |       |          |           |       |       |
|----|-----------------------------------------------------------------------------------|-------------|-------|-------|-------|----------|-----------|-------|-------|
| 58 | 2,4'-Dihydroxydiphenyl sulfone                                                    | 5397-34-2   | BP4   | 2.12  | 2.971 | negative | 249.0227  | 76.26 | 3.93% |
| 59 | Lauro lactam                                                                      | 947-04-6    | O2    | 2.93  | 2.977 | positive | 198.18524 | 86.07 | 2.32% |
| 60 | 3-(4-{2-[4-(3-chloro-2-hydroxypropoxy)phenyl]propan-2-yl}phenoxy)propane-1,2-diol | 227947-06-0 | BP20  | 3.047 | 3.05  | positive | 412.18853 | 67.67 | 2.96% |
| 61 | Phosphoric acid, diphenyl ester                                                   | 838-85-7    | PZ42  | 1.22  | 3.052 | negative | 249.03222 | 75.42 | 2.65% |
| 62 | 3-tert-butyl-4-methoxyphenol                                                      | 88-32-4     | AO118 | 2.7   | 3.057 | negative | 179.10775 | 71.52 | 2.80% |
| 63 | 2-tert-butyl-4-methoxyphenol                                                      | 121-00-6    | AO117 | 2.7   | 3.057 | negative | 179.10775 | 81.05 | 3.70% |
| 64 | Tributyl citrate                                                                  | 77-94-1     | PZ16  | 4.609 | 3.087 | positive | 361.22208 | 84.90 | 4.71% |
| 65 | 1,6 hexanediol diacrylate                                                         | 13048-33-4  | AD20  | 3.16  | 3.119 | positive | 227.12779 | 85.81 | 5.83% |
| 66 | 4-Hydroxybenzophenone                                                             | 1137-42-4   | UV6   | 2.45  | 3.129 | negative | 197.0608  | 83.53 | 3.59% |
| 67 | 3-hydroxybenzophenone                                                             | 13020-57-0  | UV18  | 2.45  | 3.129 | negative | 197.0608  | 87.37 | 6.87% |
| 68 | Drometrizole                                                                      | 2440-22-4   | UV31  | 4.28  | 3.186 | negative | 224.08294 | 85.45 | 3.51% |
| 69 | 3-(3-5-di-tert-butyl-1-hydroxy-4-oxo-2,5-cyclohexadiene-1-yl)propanoic acid       | 83237-15-4  | AO45  | 2.636 | 3.191 | negative | 293.17583 | 87.18 | 4.59% |
| 70 | 4-tert-butylphenyl glycidyl ether                                                 | 3101-60-8   | O9    | 3.67  | 3.202 | positive | 224.16451 | 87.37 | 6.87% |
| 71 | Bisphenol S-monoisopropyl ether                                                   | 95235-30-6  | BP37  | 2.57  | 3.24  | negative | 291.06965 | 86.98 | 4.60% |

|    |                                           |            |      |       |       |          |           |       |       |
|----|-------------------------------------------|------------|------|-------|-------|----------|-----------|-------|-------|
| 72 | Diisobutyl adipate                        | 141-04-8   | PZ5  | 4.125 | 3.271 | positive | 259.19039 | 85.78 | 2.33% |
| 73 | 4-Fluoro-4'-hydroxybenzophenone           | 25913-05-7 | UV5  | 2.52  | 3.272 | negative | 215.05138 | 87.21 | 5.73% |
| 74 | trimethylol propane triacrylate           | 15625-89-5 | AD3  | 2.99  | 3.279 | positive | 314.15981 | 86.50 | 4.62% |
| 75 | Tris ( 2-chloro-1-methylethyl ) phosphate | 13674-84-5 | PZ39 | 3.16  | 3.357 | positive | 327.00811 | 87.14 | 4.59% |
| 76 | Monobenzyl phthalate                      | 2528-16-7  | PZ80 | 2.03  | 3.359 | positive | 257.08084 | 86.58 | 3.47% |
| 77 | Diphenylamine                             | 122-39-4   | PZ12 | 3.184 | 3.413 | positive | 170.09643 | 86.26 | 4.64% |
| 78 | Dibutyl adipate                           | 105-99-7   | PZ4  | 4.27  | 3.43  | positive | 259.19039 | 86.60 | 3.46% |
| 79 | Bisphenol F Diglycidyl ether              | 2095-03-6  | BP30 | 3.54  | 3.43  | positive | 330.16998 | 85.83 | 3.50% |
| 80 | Benzophenone                              | 119-61-9   | UV7  | 3.03  | 3.433 | positive | 183.08044 | 86.90 | 6.90% |
| 81 | Diallyl phthalate                         | 131-17-9   | PZ74 | 2.98  | 3.443 | positive | 247.09649 | 86.25 | 4.64% |
| 82 | 2,2'-bisphenol F                          | 2467-02-9  | BP57 | 2.5   | 3.458 | negative | 199.07645 | 85.97 | 3.49% |
| 83 | bisphenol F                               | 620-92-8   | BP27 | 2.2   | 3.458 | negative | 199.07645 | 84.89 | 3.53% |
| 84 | 2,4'-dihydroxydiphenylmethane             | 2467-03-0  | BP58 | 2.26  | 3.458 | negative | 199.07645 | 86.60 | 3.46% |
| 85 | Benzoresorcinol                           | 131-56-6   | UV1  | 2.6   | 3.475 | negative | 213.05572 | 87.02 | 3.45% |
| 86 | 2,2',4,4'-Tetrahydroxybenzophenone        | 131-55-5   | UV2  | 2.1   | 3.518 | negative | 245.04555 | 84.97 | 4.71% |

|     |                                                              |             |       |       |       |          |           |       |       |
|-----|--------------------------------------------------------------|-------------|-------|-------|-------|----------|-----------|-------|-------|
| 87  | Acetyl tributyl citrate                                      | 77-90-7     | PZ17  | 5.384 | 3.528 | positive | 403.23264 | 87.28 | 5.73% |
| 88  | 2,6-di-tert-butyl-4-hydroxy-4-methylcyclohexa-2,5-dien-1-one | 10396-80-2  | AO120 | 3.508 | 3.544 | negative | 235.17035 | 87.38 | 6.87% |
| 89  | 4 , 4'-thiobisphenol                                         | 2664-63-3   | BP9   | 2.27  | 3.55  | negative | 217.03287 | 87.25 | 5.73% |
| 90  | Oxybenzone                                                   | 131-57-7    | UV4   | 3.53  | 3.621 | positive | 229.08592 | 81.88 | 7.33% |
| 91  | 2-tert-butyl-5-methylphenol                                  | 88-60-8     | AO30  | 3.22  | 3.728 | negative | 163.11284 | 85.83 | 2.33% |
| 92  | 2-tert-Butyl-4-methylphenol                                  | 2409-55-4   | AO29  | 3.22  | 3.728 | negative | 163.11284 | 86.80 | 5.76% |
| 93  | Dipropyl phthalate                                           | 131-16-8    | PZ76  | 3.35  | 3.739 | positive | 251.12779 | 80.03 | 5.00% |
| 94  | Bisphenol E                                                  | 2081-08-5   | BP26  | 2.29  | 3.75  | negative | 213.0921  | 84.75 | 7.08% |
| 95  | p-Benzylphenol                                               | 101-53-1    | BP41  | 2.8   | 3.76  | negative | 183.08154 | 86.07 | 4.65% |
| 96  | Bisphenol F bis(3-chloro-2-hydroxypropyl) ether              | 235741-59-0 | BP29  | 3.62  | 3.81  | positive | 402.12334 | 86.88 | 3.45% |
| 97  | Benzophenone-6                                               | 131-54-4    | UV10  | 3.27  | 3.81  | negative | 273.07685 | 86.78 | 4.61% |
| 98  | 7,9-di-tert-butyl-1-oxaspiro[4.5]deca-6,9-diene-2,8-dione    | 82304-66-3  | AO36  | 3.85  | 3.855 | positive | 277.17982 | 86.33 | 5.79% |
| 99  | Tris ( 2-butoxyethyl ) phosphate                             | 78-51-3     | PZ38  | 4.881 | 3.945 | positive | 399.25062 | 85.13 | 5.87% |
| 100 | 2 , 2'-dihydroxy-4-methoxybenzophenone                       | 131-53-3    | UV11  | 2.94  | 3.968 | negative | 243.06628 | 86.96 | 5.75% |
| 101 | Isopentyl p-methoxycinnamate                                 | 71617-10-2  | UV40  | 4.62  | 3.969 | positive | 249.14852 | 86.22 | 3.48% |

|     |                                                                                       |            |      |       |       |          |           |       |        |
|-----|---------------------------------------------------------------------------------------|------------|------|-------|-------|----------|-----------|-------|--------|
| 102 | 3,5-Di-tert-butyl-4-hydroxybenzyl alcohol                                             | 88-26-6    | AO48 | 3.13  | 3.99  | negative | 235.17035 | 85.14 | 2.35%  |
| 103 | Bisphenol A diglycidyl ether                                                          | 1675-54-3  | BP19 | 4.11  | 4.019 | positive | 358.20128 | 87.20 | 6.88%  |
| 104 | Bisphenol A                                                                           | 80-05-7    | BP14 | 2.38  | 4.04  | negative | 227.10775 | 87.39 | 3.43%  |
| 105 | Bisphenol A-d16                                                                       | 96210-87-6 | IS5  | 2.39  | 4.045 | negative | 241.19563 | 86.55 |        |
| 106 | 4-(1-phenylethyl)phenol                                                               | 1988-89-2  | BP55 | 3.08  | 4.05  | negative | 197.09719 | 77.64 | 3.86%  |
| 107 | Tributyl phosphate                                                                    | 126-73-8   | PZ35 | 4.12  | 4.085 | positive | 267.17197 | 77.68 | 6.44%  |
| 108 | Bisphenol A (3-chloro-2-hydroxypropyl) glycidyl ether                                 | 13836-48-1 | BP16 | 4.21  | 4.212 | positive | 394.17796 | 83.85 | 7.16%  |
| 109 | 2-(1,1-dimethylethyl)-4,6-dimethylphenol                                              | 1879-09-0  | AO31 | 3.52  | 4.242 | negative | 177.12849 | 74.46 | 4.03%  |
| 110 | Butyl glycolyl butyl phthalate                                                        | 85-70-1    | PZ67 | 4.38  | 4.252 | positive | 337.16456 | 72.87 | 8.23%  |
| 111 | Tris ( 1 , 3-dichloro-2-propyl ) phosphate                                            | 13674-87-8 | PZ37 | 4.26  | 4.28  | positive | 428.89119 | 75.30 | 19.64% |
| 112 | 2-hydroxy-5-methylbenzophenone                                                        | 1470-57-1  | UV14 | 3.63  | 4.292 | negative | 211.07645 | 87.30 | 5.92%  |
| 113 | 3',5'-Bis(tert-butyl)-4'-hydroxyacetophenone                                          | 14035-33-7 | AO38 | 3.903 | 4.317 | positive | 249.18491 | 94.40 | 3.10%  |
| 114 | p-cumylphenol                                                                         | 599-64-4   | BP42 | 3.35  | 4.34  | negative | 211.11284 | 78.00 | 21.71% |
| 115 | 1-chloro-3-(4-{2-[4-(3-chloro-2-hydroxypropoxy)phenyl]propan-2-yl}phenoxy)propan-2-ol | 4809-35-2  | BP18 | 4.26  | 4.405 | positive | 430.15464 | 80.15 | 3.74%  |
| 116 | 3,5-Di-tert-butyl-4-hydroxybenzoic acid                                               | 1421-49-4  | AO22 | 3.05  | 4.417 | negative | 249.14962 | 86.22 | 3.48%  |



|     |                                                     |             |       |       |       |          |           |       |       |
|-----|-----------------------------------------------------|-------------|-------|-------|-------|----------|-----------|-------|-------|
| 117 | trimethylpropane trimethacrylate                    | 3290-92-4   | AD8   | 4.22  | 4.466 | positive | 356.20676 | 86.81 | 5.76% |
| 118 | Diisobutyl phthalate                                | 84-69-5     | PZ52  | 4.33  | 4.469 | positive | 279.15909 | 85.14 | 5.87% |
| 119 | 3,5-di-tert-butyl-4-hydroxybenzaldehyde             | 1620-98-0   | AO25  | 3.82  | 4.472 | negative | 233.1547  | 87.20 | 2.29% |
| 120 | bisphenol B                                         | 77-40-7     | BP24  | 2.62  | 4.49  | negative | 241.1234  | 87.39 | 5.72% |
| 121 | Tetradecanamide                                     | 638-58-4    | LB3   | 4.82  | 4.561 | positive | 228.23219 | 87.01 | 4.60% |
| 122 | 3,5-di-tert-butyl-4-hydroxyanisole                  | 489-01-0    | AO21  | 4.25  | 4.602 | negative | 235.17035 | 87.11 | 4.59% |
| 123 | Dibutyl phthalate                                   | 84-74-2     | PZ50  | 4.15  | 4.628 | positive | 279.15909 | 85.48 | 5.85% |
| 124 | Mono(2-ethylhexyl) terephthalate                    | 155603-50-2 | PZ110 | 3.42  | 4.657 | negative | 277.14453 | 87.14 | 5.74% |
| 125 | Mono-(2-ethylhexyl)phthalate                        | 4376-20-9   | PZ60  | 2.53  | 4.657 | positive | 279.15909 | 86.62 | 4.62% |
| 126 | 3,5-(1,1-Dimethylethyl)-4-hydroxybenzenepropanol    | 36294-23-2  | AO56  | 3.726 | 4.726 | negative | 263.20165 | 87.31 | 4.58% |
| 127 | 3,5-ditert-butylphenol                              | 1138-52-9   | AO32  | 3.83  | 4.76  | negative | 205.15979 | 87.40 | 6.87% |
| 128 | 2,4-di-tert-butylphenol                             | 96-76-4     | AO17  | 4.22  | 4.76  | negative | 205.15979 | 85.71 | 5.83% |
| 129 | 2,6-Di-tert-butylphenol                             | 128-39-2    | AO37  | 4.84  | 4.76  | negative | 205.15979 | 85.55 | 5.84% |
| 130 | bisphenol AF                                        | 1478-61-1   | BP22  | 2.67  | 4.77  | negative | 335.05122 | 83.96 | 7.15% |
| 131 | 3-(3,5-di-tert-butyl-4-hydroxyphenyl)propanoic acid | 20170-32-5  | AO26  | 3.52  | 4.842 | negative | 277.18092 | 84.77 | 2.36% |

|     |                                                        |            |       |       |       |          |           |       |       |
|-----|--------------------------------------------------------|------------|-------|-------|-------|----------|-----------|-------|-------|
| 132 | Di-trimethylol propane tetraacrylate                   | 94108-97-1 | AD7   | 4.7   | 4.858 | positive | 484.25411 | 80.73 | 2.48% |
| 133 | bisphenol Z                                            | 843-55-0   | BP38  | 3.13  | 4.915 | negative | 267.13905 | 87.20 | 3.44% |
| 134 | Methyl 3-(3,5-di-tert-butyl-4-hydroxyphenyl)propionate | 6386-38-5  | AO27  | 4.8   | 4.988 | negative | 291.19657 | 87.39 | 2.29% |
| 135 | 2,6-Di-tert-butyl-4-(ethoxymethyl)phenol               | 3080-84-0  | AO119 | 4.785 | 4.992 | negative | 263.20165 | 63.36 | 3.16% |
| 136 | Benzyl butyl phthalate                                 | 85-68-7    | PZ48  | 4.53  | 5.029 | positive | 313.14344 | 87.38 | 2.29% |
| 137 | Triphenyl phosphate                                    | 115-86-6   | PZ36  | 3.95  | 5.088 | positive | 327.07807 | 86.38 | 3.47% |
| 138 | p-Octylacetophenone                                    | 10541-56-7 | AO109 | 5.91  | 5.156 | positive | 233.18999 | 86.88 | 5.76% |
| 139 | Bisphenol AP                                           | 1571-75-1  | BP23  | 2.95  | 5.179 | negative | 289.1234  | 86.67 | 6.92% |
| 140 | Diisopentyl phthalate                                  | 605-50-5   | PZ66  | 5.31  | 5.202 | positive | 307.19039 | 83.67 | 5.98% |
| 141 | 4,4'-(4-Methylpentane-2,2-diyl)diphenol                | 6807-17-6  | BP10  | 3.24  | 5.22  | negative | 269.1547  | 93.20 | 3.44% |
| 142 | Di-tert-butyl-m-cresol                                 | 497-39-2   | AO39  | 4.63  | 5.273 | negative | 219.17544 | 87.36 | 2.29% |
| 143 | 4,6-di-tert-butyl-o-cresol                             | 616-55-7   | AO34  | 4.63  | 5.273 | negative | 219.17544 | 77.03 | 5.19% |
| 144 | 2,6-di-tert-butyl-p-cresol                             | 128-37-0   | AO95  | 5.26  | 5.273 | negative | 219.17544 | 87.31 | 6.87% |
| 145 | Diphenyl phthalate                                     | 84-62-8    | PZ75  | 4     | 5.296 | positive | 319.09649 | 85.96 | 3.49% |
| 146 | bumetizole                                             | 3896-11-5  | UV27  | 8.7   | 5.331 | negative | 314.10656 | 86.29 | 3.48% |

|     |                                                       |             |       |       |       |          |           |       |       |
|-----|-------------------------------------------------------|-------------|-------|-------|-------|----------|-----------|-------|-------|
| 147 | Ethyl 3-(3,5-di-tert-butyl-4-hydroxyphenyl)propanoate | 36294-24-3  | AO28  | 5.26  | 5.345 | negative | 305.21222 | 84.68 | 4.72% |
| 148 | 2-Ethylhexyl trans-4-methoxycinnamate                 | 83834-59-7  | UV38  | 6.42  | 5.38  | negative | 291.19547 | 84.77 | 3.54% |
| 149 | Dipentyl phthalate                                    | 131-18-0    | PZ54  | 5.6   | 5.517 | positive | 307.19039 | 84.66 | 2.36% |
| 150 | Dicyclohexyl phthalate                                | 84-61-7     | PZ51  | 5.855 | 5.579 | positive | 331.19039 | 87.40 | 3.43% |
| 151 | Nonylphenol                                           | 26543-97-5  | O10   | 5.01  | 5.582 | positive | 219.17544 | 87.24 | 6.88% |
| 152 | 2,6-di-tert-butyl-4-ethylphenol                       | 4130-42-1   | AO35  | 5.758 | 5.718 | negative | 233.19109 | 87.39 | 4.58% |
| 153 | Bisphenol TMC                                         | 129188-99-4 | BP47  | 4.13  | 5.79  | negative | 309.186   | 87.33 | 5.73% |
| 154 | Octrizole                                             | 123307-21-1 | UV30  | 7.95  | 5.903 | negative | 322.19249 | 86.80 | 6.91% |
| 155 | Oleamide                                              | 301-02-0    | LB1   | 6.6   | 5.977 | positive | 282.27914 | 91.20 | 4.61% |
| 156 | 4,4'-Isopropylidenedi-2,6-xylol                       | 5613-46-7   | BP12  | 3.54  | 6.099 | negative | 283.17035 | 80.67 | 2.48% |
| 157 | 4-benzoyl-4-methyldiphenyl sulfide                    | 83846-85-9  | UV23  | 6.39  | 6.135 | positive | 305.09946 | 85.79 | 2.33% |
| 158 | 2, 2'-diallyl bisphenol A                             | 1745-89-7   | BP2   | 3.75  | 6.242 | negative | 307.17035 | 85.27 | 3.52% |
| 159 | 2, 4, 6-tri-t-butylphenol                             | 732-26-3    | AO101 | 6.35  | 6.305 | negative | 261.22239 | 86.86 | 5.76% |
| 160 | Bisphenol BP                                          | 1844-01-5   | BP44  | 3.74  | 6.31  | negative | 351.13905 | 85.85 | 5.82% |
| 161 | Dihexyl phthalate                                     | 84-75-3     | PZ65  | 6.82  | 6.406 | positive | 335.22169 | 85.37 | 7.03% |

|     |                                                            |            |          |       |       |          |           |       |       |
|-----|------------------------------------------------------------|------------|----------|-------|-------|----------|-----------|-------|-------|
| 162 | Butyl octyl phthalate                                      | 84-78-6    | PZ93     | 6.89  | 6.406 | positive | 335.22169 | 86.07 | 5.81% |
| 163 | 2,4-Di-tert-butyl-6-(5-chlorobenzotriazol-2-yl) phenol     | 3864-99-1  | UV29/IS4 | 9.69  | 6.491 | negative | 356.15351 | 86.52 | 4.62% |
| 164 | Bisphenol G                                                | 127-54-8   | BP45     | 4.01  | 6.53  | negative | 311.20165 | 85.92 | 3.49% |
| 165 | Tri-p-cresyl phosphate                                     | 1330-78-5  | PZ44     | 5.628 | 6.628 | positive | 369.12502 | 86.52 | 4.62% |
| 166 | Bisphenol A dimethacrylate                                 | 3253-39-2  | BP21     | 6.04  | 6.637 | positive | 382.20128 | 82.11 | 7.31% |
| 167 | Bisphenol P                                                | 2167-51-3  | BP35     | 4.5   | 6.724 | negative | 345.186   | 82.09 | 4.87% |
| 168 | Octabenzone                                                | 1843-05-6  | UV20     | 8.15  | 6.724 | negative | 325.18092 | 87.80 | 3.45% |
| 169 | bis(2-ethylhexyl) fumarate                                 | 141-02-6   | PZ21     | 7.71  | 6.763 | positive | 341.26864 | 91.30 | 5.83% |
| 170 | 2-(2H-Benzotriazol-2-yl)-4,6-bis(2-methyl-2-butanyl)phenol | 25973-55-1 | UV28     | 9.54  | 6.766 | negative | 350.22379 | 85.52 | 3.51% |
| 171 | Di-(2-ethylhexyl) adipate                                  | 103-23-1   | PZ2      | 8.69  | 6.828 | positive | 371.31559 | 86.33 | 2.32% |
| 172 | Bisphenol M                                                | 13595-25-0 | BP34/IS2 | 4.28  | 7.01  | negative | 345.186   | 85.27 | 2.35% |
| 173 | Bisphenol PH                                               | 24038-68-4 | BP46     | 3.98  | 7.339 | negative | 379.17035 | 84.21 | 2.37% |
| 174 | butyryl trihexyl citrate                                   | 82469-79-2 | PZ124    | 9.656 | 7.34  | positive | 515.35785 | 77.83 | 3.85% |
| 175 | 2, 2-methylenebis ( 6-t-butyl-p-cresol )                   | 119-47-1   | AO102    | 7.05  | 7.575 | negative | 339.23295 | 84.10 | 7.13% |
| 176 | 2,5-Bis(5-tert-butyl-benzoxazol-2-yl)thiophene             | 7128-64-5  | UV32     | 9.82  | 7.58  | positive | 431.17878 | 84.99 | 7.06% |

|     |                                                             |             |           |       |       |          |           |       |       |
|-----|-------------------------------------------------------------|-------------|-----------|-------|-------|----------|-----------|-------|-------|
| 177 | 6,6'-di-tert-butyl-4,4'-thiodi-m-cresol                     | 96-69-5     | AO97/IS3  | 5.22  | 7.672 | negative | 357.18937 | 84.39 | 7.11% |
| 178 | Bis(2-ethylhexyl) phthalate                                 | 117-81-7    | PZ49      | 8.676 | 8.025 | positive | 391.28429 | 83.85 | 2.39% |
| 179 | DEHP-3,4,5,6-d4                                             | 93951-87-2  | PZ123/IS1 | 8.68  | 8.025 | positive | 395.30939 | 87.40 | 6.87% |
| 180 | Octyl 3-(3,5-di-tert-butyl-4-hydroxyphenyl)propanoate       | 125643-61-0 | AO23      | 8.59  | 8.09  | negative | 389.30612 | 79.10 | 5.85% |
| 181 | Diisononyl hexahydrophthalate                               | 166412-78-8 | PZ56      | 10.24 | 8.183 | positive | 425.36254 | 74.80 | 4.71% |
| 182 | Dioctyl phthalate                                           | 117-84-0    | PZ71      | 9.035 | 8.185 | positive | 391.28429 | 67.80 | 3.44% |
| 183 | 2, 2-methylenebis ( 4-ethyl-6-t-butylphenol )               | 88-24-4     | AO100     | 8     | 8.464 | negative | 367.26425 | 73.60 | 4.78% |
| 184 | 1,2-Bis(3,5-di-tert-butyl-4-hydroxyhydrocinnamoyl)hydrazine | 32687-78-8  | AO5       | 6.43  | 8.511 | negative | 551.38543 | 75.90 | 5.56% |
| 185 | 1,10-bis(2-ethylhexyl) decanedioate                         | 122-62-3    | PZ104     | 10.24 | 8.606 | positive | 444.40474 | 72.99 | 2.74% |
| 186 | Diisononyl phthalate                                        | 68515-48-0  | PZ63      | 9.46  | 8.759 | positive | 419.31559 | 67.90 | 3.92% |
| 187 | Tris ( 2-ethylhexyl ) phosphate                             | 78-42-2     | PZ41      | 9.984 | 9.182 | positive | 435.35977 | 69.10 | 2.59% |
| 188 | Bis[2,4-bis(2-methyl-2-propanyl)phenyl] hydrogen phosphate  | 69284-93-1  | AO41      | 1.87  | 9.232 | negative | 473.2826  | 63.10 | 2.52% |
| 189 | 2,2',6,6'-Tetra-tert-butyl-4,4'-methylenediphenol           | 118-82-1    | AO94      | 9.1   | 9.638 | negative | 423.32685 | 59.10 | 2.51% |
| 190 | Diisodecyl phthalate                                        | 26761-40-0  | PZ62      | 10.35 | 9.648 | positive | 447.34569 | 69.20 | 5.01% |
| 191 | Bis(2-propylheptyl) phthalate                               | 53306-54-0  | PZ53      | 10.34 | 9.804 | positive | 447.34689 | 61.20 | 2.44% |

|     |                                                                             |            |       |        |        |          |           |       |       |
|-----|-----------------------------------------------------------------------------|------------|-------|--------|--------|----------|-----------|-------|-------|
| 192 | N,N'-(Hexane-1,6-diyl)bis(3-(3,5-di-tert-butyl-4-hydroxyphenyl)propanamide) | 23128-74-7 | AO12  | 7.269  | 9.813  | negative | 635.47933 | 62.70 | 4.83% |
| 193 | Naugard DLTDP                                                               | 123-28-4   | AO4   | 11.96  | 10.499 | positive | 515.41286 | 57.80 | 3.62% |
| 194 | Alpha tocopherol                                                            | 59-02-9    | AO108 | 10.78  | 10.508 | negative | 429.3738  | 33.20 | 6.10% |
| 195 | Diocetyldiphenylamine                                                       | 101-67-7   | AO111 | 10.54  | 10.664 | positive | 394.34683 | 59.10 | 7.04% |
| 196 | Diundecyl phthalate                                                         | 3648-20-2  | PZ72  | 11.4   | 10.852 | positive | 475.37819 | 54.80 | 4.59% |
| 197 | Tris(2-ethylhexyl) benzene-1,2,4-tricarboxylate                             | 3319-31-1  | PZ122 | 11.8   | 11.051 | positive | 547.39932 | 53.10 | 2.34% |
| 198 | Irganox 259                                                                 | 35074-77-2 | AO8   | 10.48  | 11.271 | negative | 637.44736 | 43.20 | 2.36% |
| 199 | tris isocyanuric acid                                                       | 40601-76-1 | AO116 | 10.05  | 11.615 | positive | 717.45856 | 47.90 | 7.18% |
| 200 | Ditridecyl phthalate                                                        | 119-06-2   | PZ78  | 12.41  | 12.63  | positive | 531.44079 | 39.10 | 4.60% |
| 201 | Hostanox O3                                                                 | 32509-66-3 | AO6   | 7.39   | 12.639 | negative | 793.46849 | 33.70 | 6.88% |
| 202 | irganox 3114                                                                | 27676-62-6 | AO3   | 11.97  | 13.169 | positive | 801.55246 | 29.70 | 3.85% |
| 203 | 2,4-Bis(octylthio)-6-(4-hydroxy-3,5-ditert-butylanilino)-1,3,5-triazine     | 991-84-4   | AO16  | 12.198 | 13.372 | negative | 587.3823  | 33.90 | 2.48% |
| 204 | irganox 1330                                                                | 1709-70-2  | AO2   | 12.8   | 18.149 | positive | 792.62892 | 14.90 | 3.68% |
| 205 | irganox 1010                                                                | 6683-19-8  | AO1   | 13.2   | 19.288 | positive | 1194.8179 | 13.70 | 3.76% |
