# Supplementary figures and images for: Development of a generic sample preparation method using dispersive liquid–liquid microextraction for the monitoring of leachable compounds in hospital pharmacy-prepared prefilled drug products
Source: Royal Society of Chemistry journal article supplement (doi:10.1039/d3ay02234j), 2024-01-01

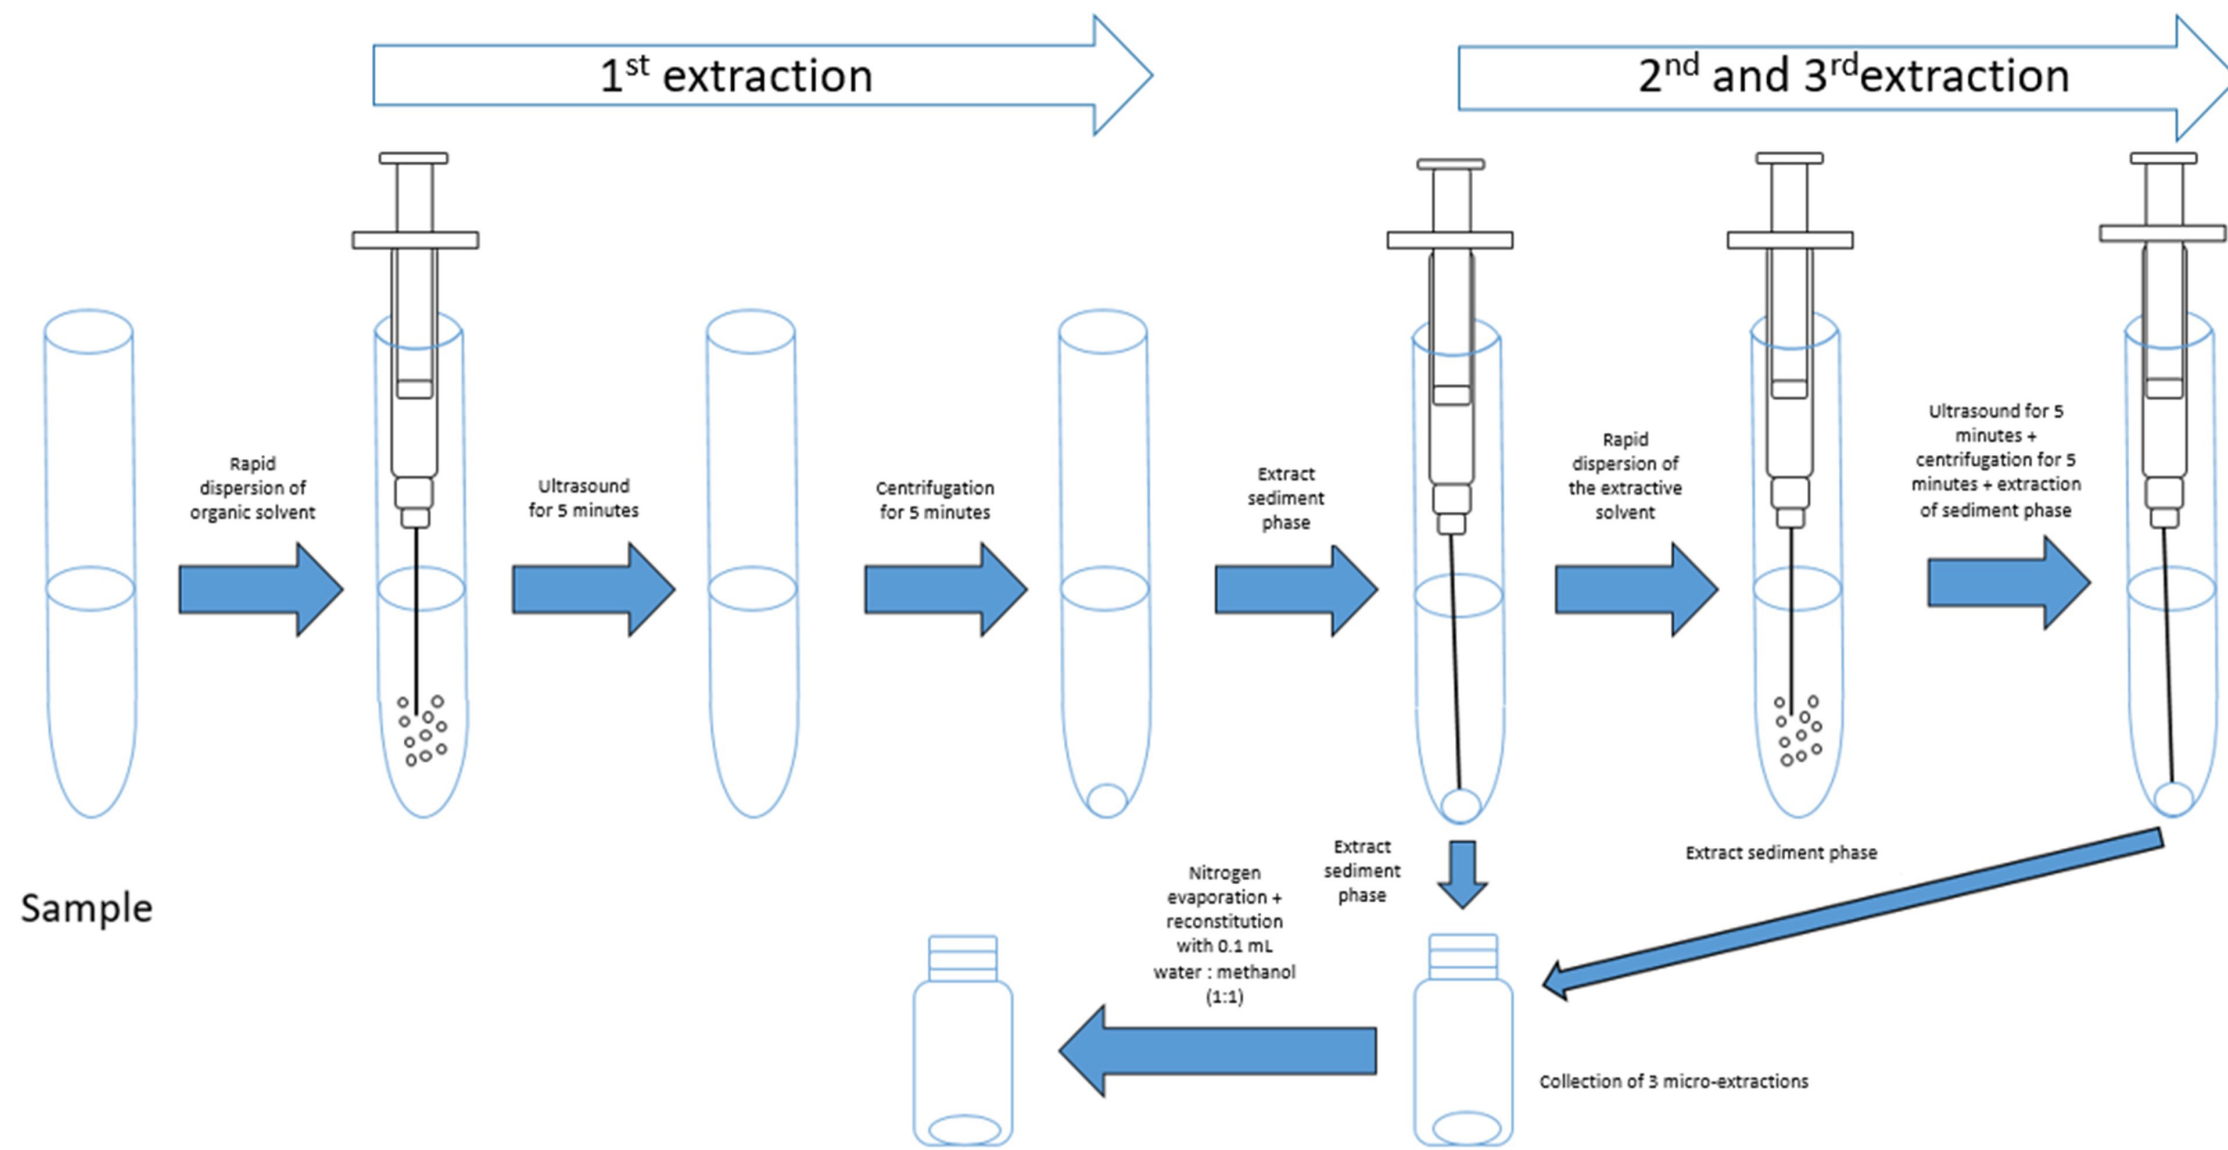

Supplement: d3ay02234j3.pdf [file d3ay02234j3.pdf]

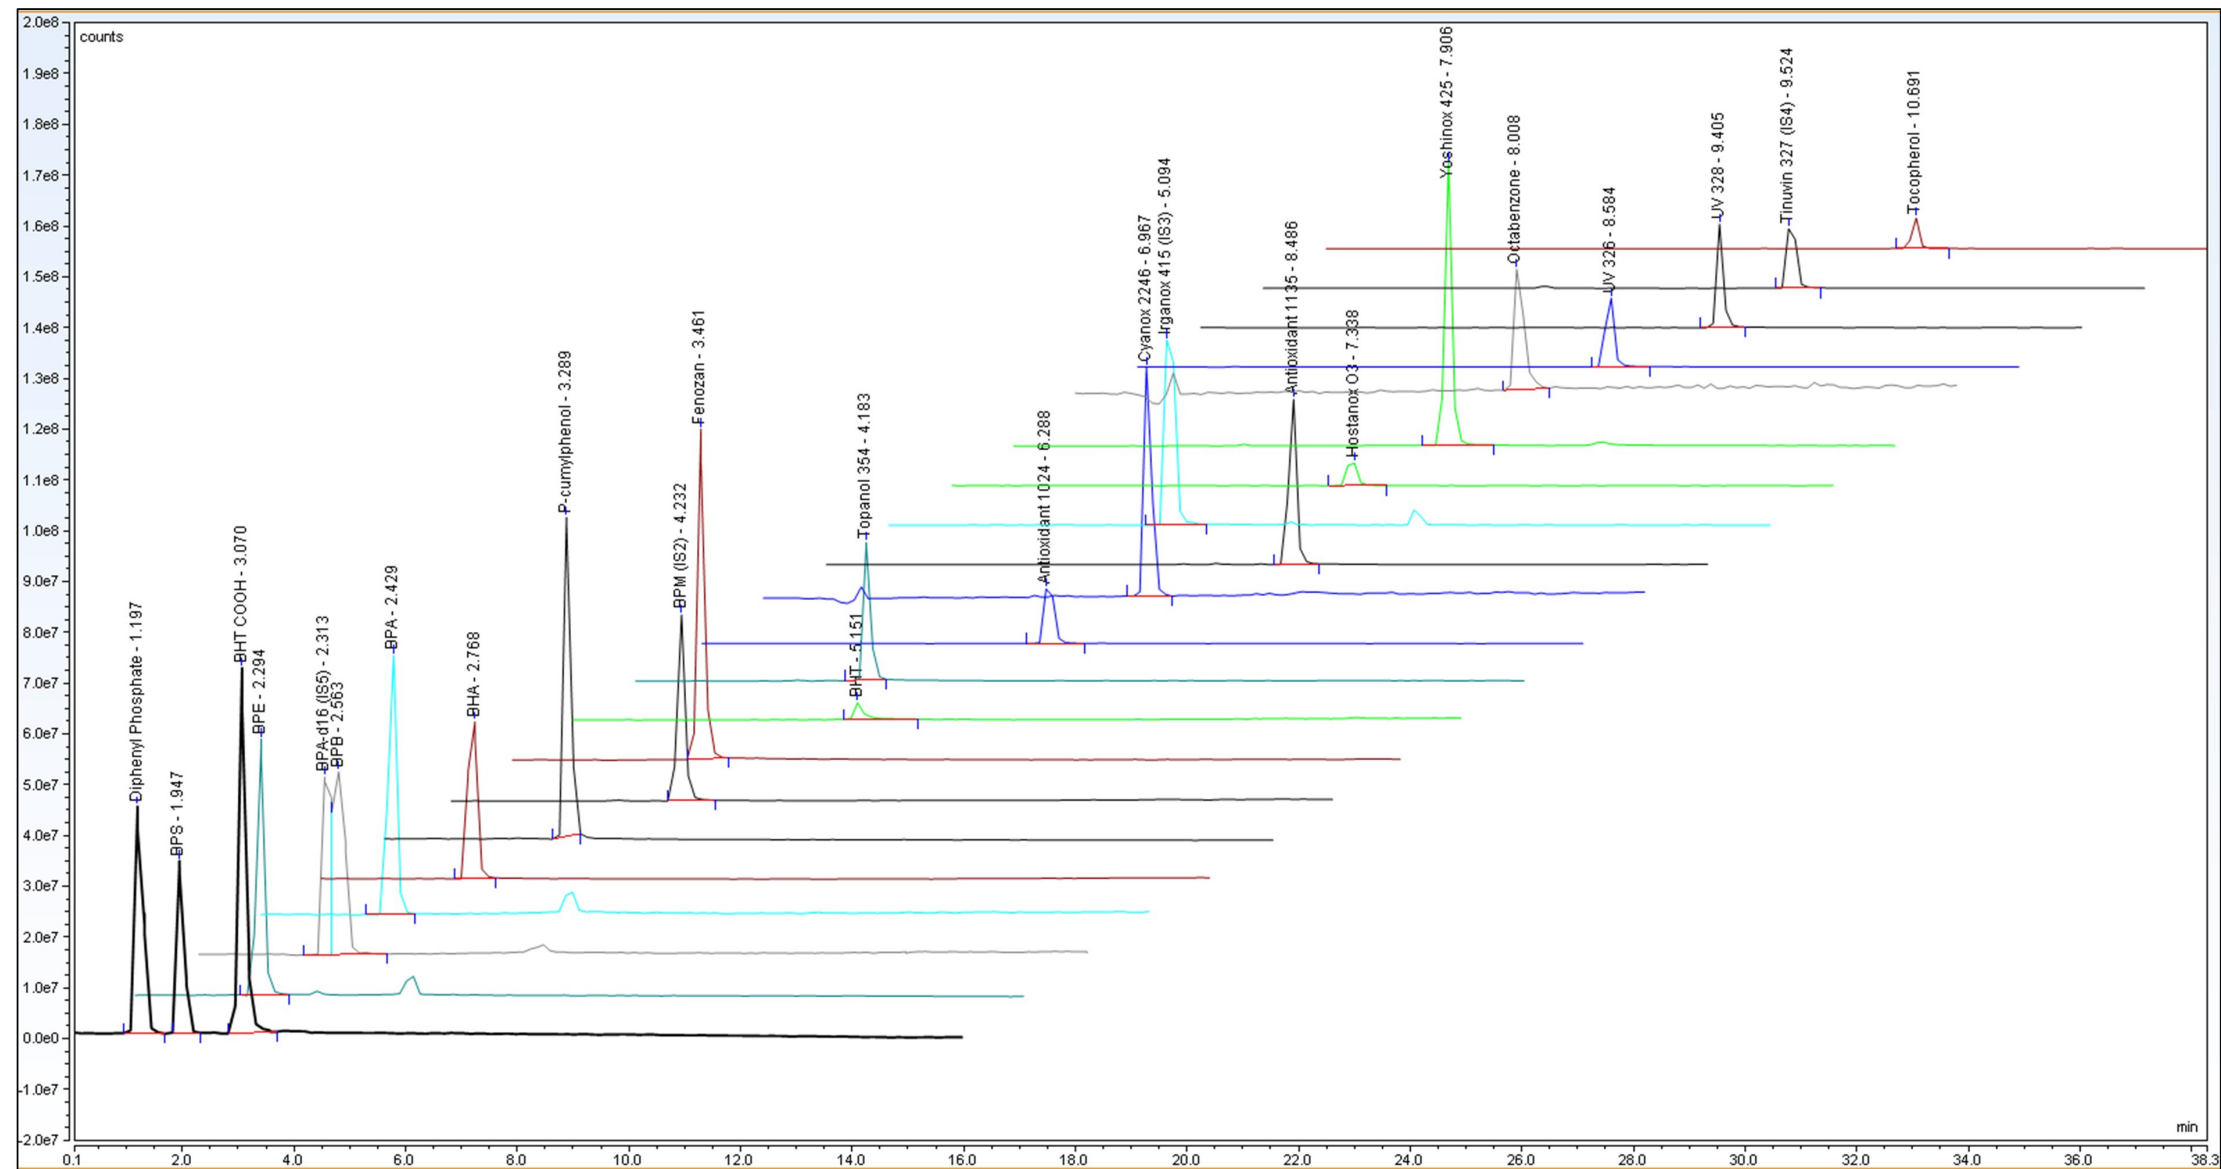

Supplement: d3ay02234j4.pdf [file d3ay02234j4.pdf]

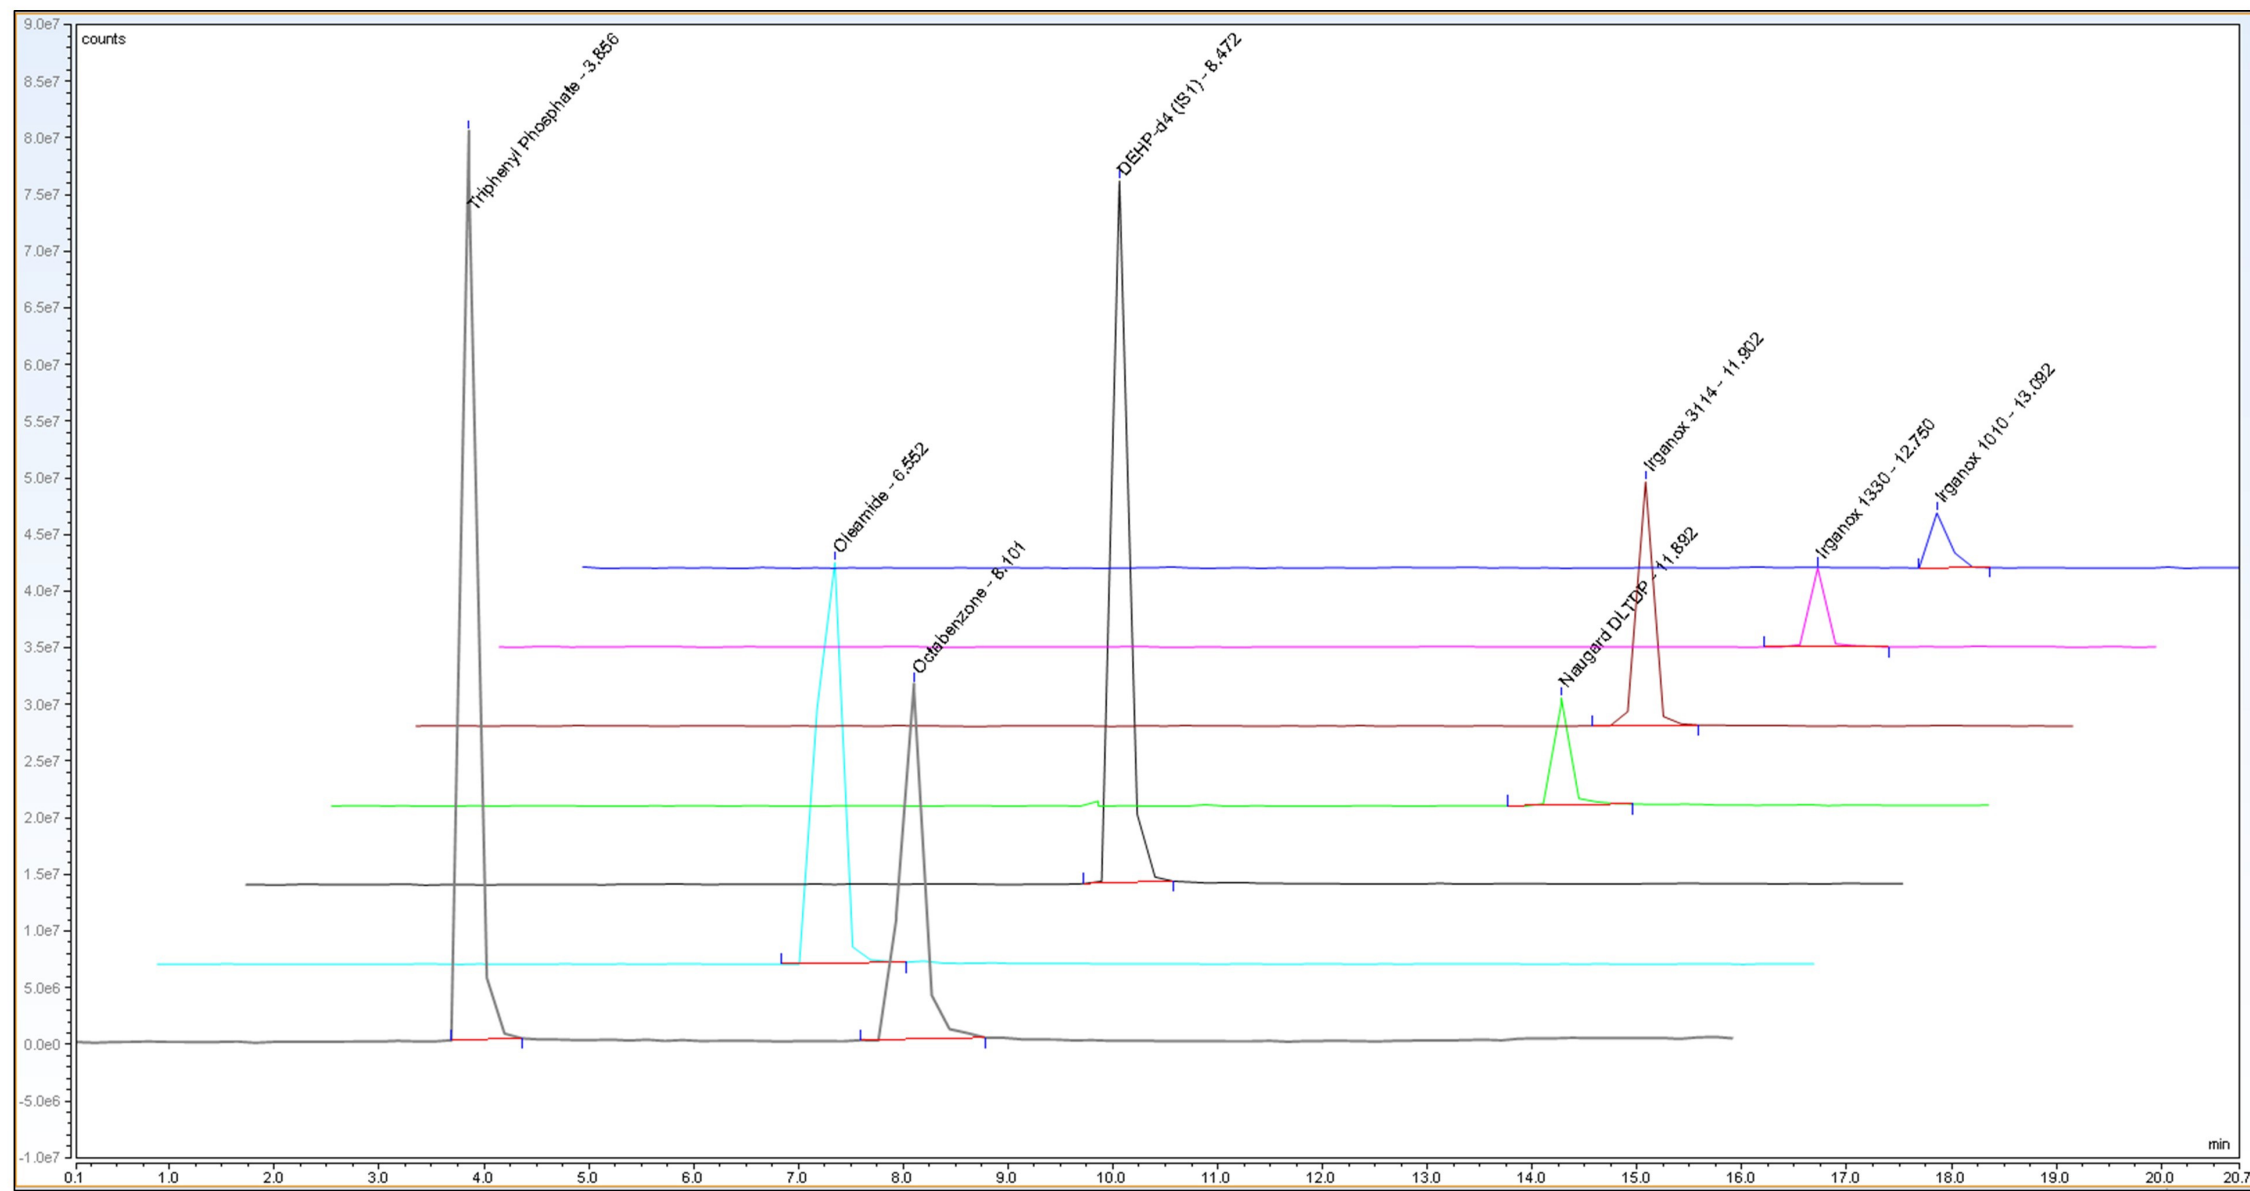

Supplement: d3ay02234j5.pdf [file d3ay02234j5.pdf]

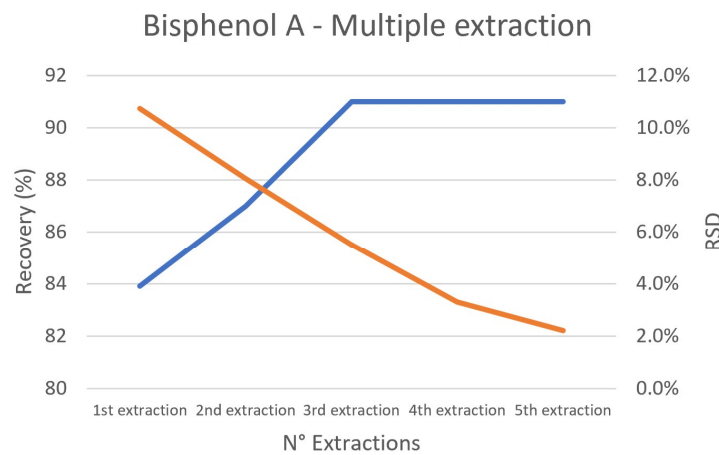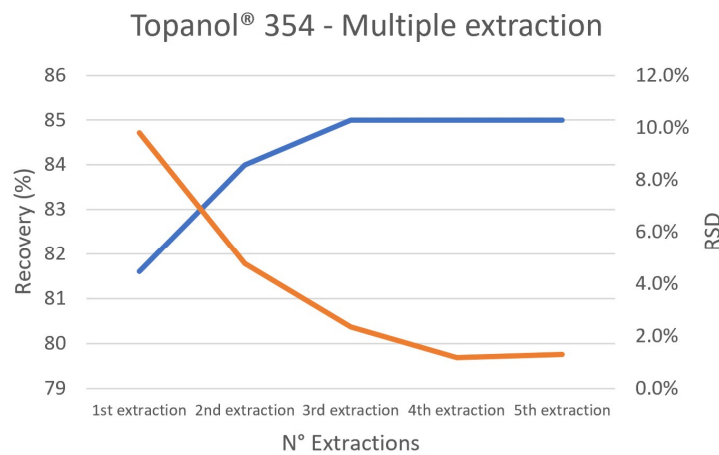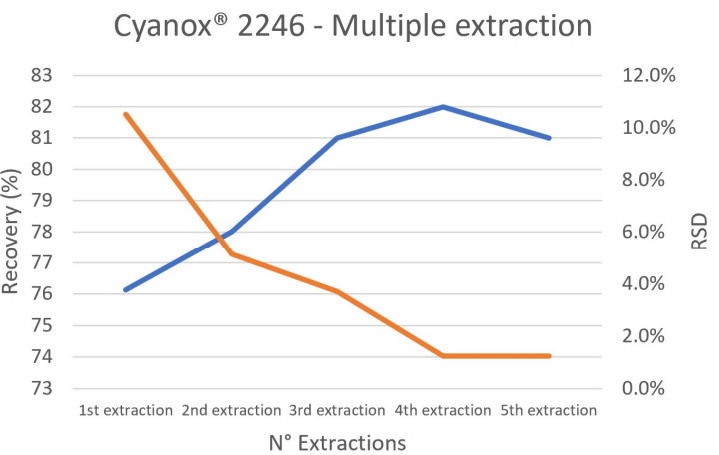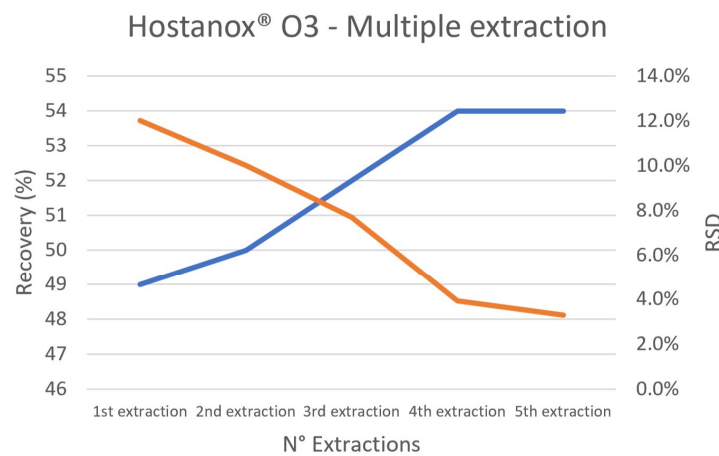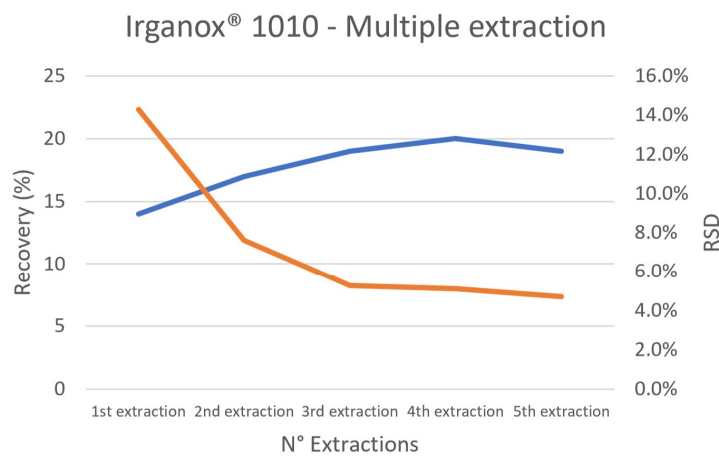

Supplement: d3ay02234j6.pdf [file d3ay02234j6.pdf]

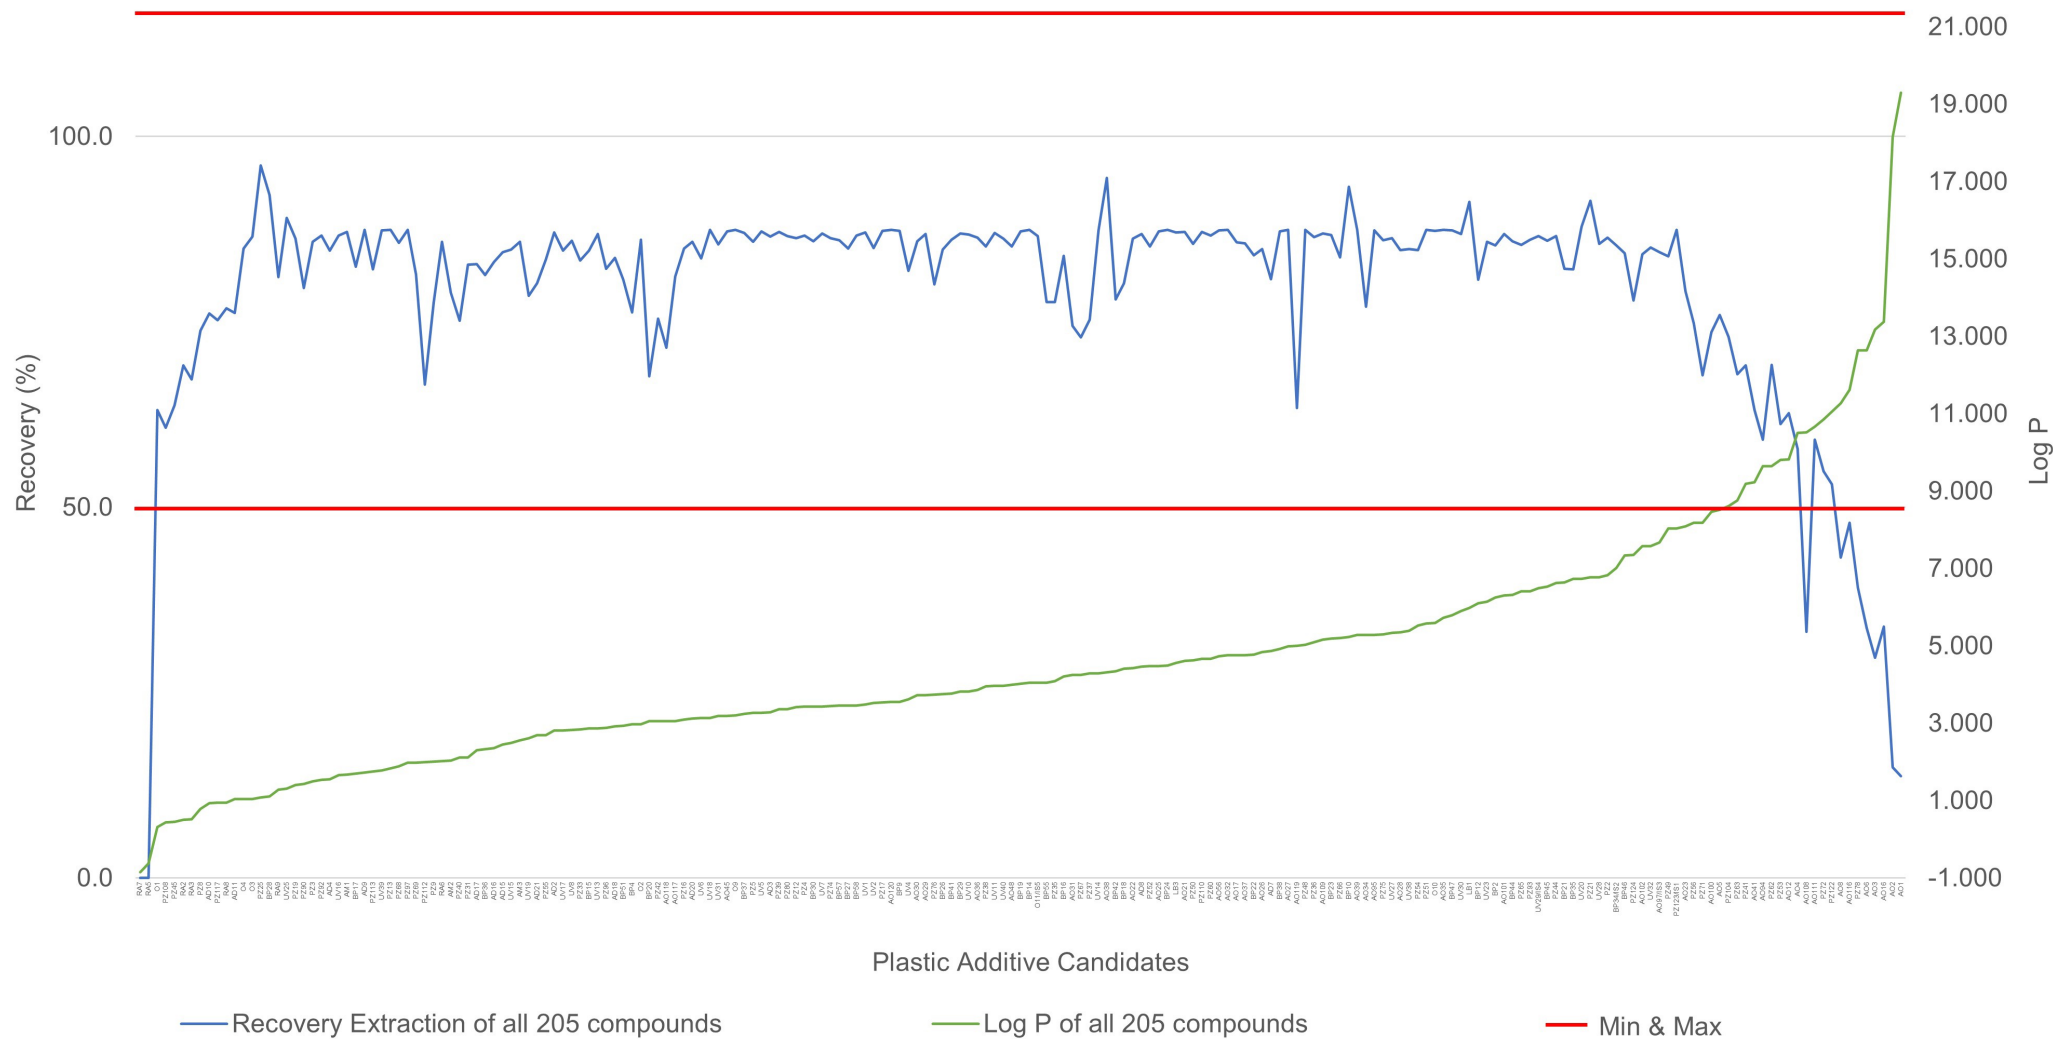

Supplement: d3ay02234j7.pdf [file d3ay02234j7.pdf]
